1           **Downregulation of Perilipin1 by IMD leads to LD reconfiguration and**  
2                           **adaptation to bacterial infection in *Drosophila***

3  
4   **Lei Wang<sup>1,2,5\*</sup>, Jiaxin Lin<sup>2,3,5\*</sup>, Junjing Yu<sup>4</sup>, Kaiyan Yang<sup>2,3,5</sup>, Li Sun<sup>2,3,5</sup>, Hong**  
5   **Tang<sup>2#</sup> and Lei Pan<sup>2,3,6#</sup>**

6   <sup>1</sup> Wuhan Institute of Virology, Chinese Academy of Sciences, Wuhan, Hubei 430071,  
7   China

8   <sup>2</sup> The Center for Microbes, Development and Health; Key Laboratory of Molecular  
9   Virology and Immunology, Institut Pasteur of Shanghai, Chinese Academy of Sciences,  
10   Shanghai 200031, China

11   <sup>3</sup> CAS Center for Excellence in Biotic Interactions, University of Chinese Academy of  
12   Sciences, Beijing 100049, China

13   <sup>4</sup> Shanghai Institute of Biochemistry and Cell Biology, Chinese Academy of Sciences,  
14   Shanghai 200031, China.

15   <sup>5</sup> University of Chinese Academy of Sciences, Beijing 100049, China

16   <sup>6</sup> Lead contact

17  
18   \* These authors contribute equally.

19   #Correspondence: H. Tang ([htang@ips.ac.cn](mailto:htang@ips.ac.cn)) or L. Pan ([panlei@ips.ac.cn](mailto:panlei@ips.ac.cn)).

20

21

22

23 **ABSTRACT**

24 Lipid droplets (LDs) are dynamic intracellular organelles critical for lipid metabolism.  
25 Dynamic alterations in the configurations and functions of LDs during innate immune  
26 response to bacterial infections and the underlying mechanisms however, remain  
27 largely unknown. Herein, we trace the time-course morphology of LDs in fat bodies of  
28 *Drosophila* after transient bacterial infection. Detailed analysis shows that *perilipin1*  
29 (*plin1*), a core gene regulating lipid metabolism of LDs is suppressed by IMD/Relish,  
30 an innate immune signaling. During immune activation, downregulated *plin1* promotes  
31 the enlargement of LDs, which in turn alleviates immune reaction-associated reactive  
32 oxygen species (ROS) stress. Thus, the growth of LDs is likely an active adaptation to  
33 maintain redox homeostasis in response to IMD activation. Therefore, our study  
34 provides evidence that *plin1* serves as a modulator on LDs' reconfiguration in  
35 regulating infection-induced pathogenesis, and Plin1 might be a potential therapeutic  
36 target for coordinating inflammation resolution and lipid metabolism.

37

38 **INTRODUCTION**

39 Immune activation is essentially accompanied by metabolic reprogramming, which  
40 redistributes accessible energy to prioritize immune protection against pathogenic  
41 infections (1, 2). Thus, stringent regulation of metabolic machinery in response to  
42 immunoreaction is critical for the host fitness. Besides carbohydrates, lipids provide  
43 another important bioenergetic and synthetic resource to the host. Not limit to this, a  
44 number of lipid metabolites in turn have been reported to play key roles in pro- or anti-  
45 inflammatory pathways (3-5). In all eukaryotic and some prokaryotic cells, there are

46 important intracellular organelles, lipid droplets (LDs), which provide a major place for  
47 the synthesis, lysis, transfer and storage of lipids or their derived metabolites (6). LDs  
48 contain a hydrophobic core of neutral lipids, such as di/triacylglycerols or sterol esters,  
49 which is surrounded with a phospholipid monolayer decorated by different proteins (7).  
50 Previously, LDs were considered to get involved in many physiological and  
51 pathological processes just because of their main functions on storing/providing energy  
52 and/or buffering toxic lipid species through modulating enzymic or autophagic lipolysis  
53 (8, 9). So far, emerging evidences have shown that LDs also take part in immune  
54 regulation. For instance, LDs modulate functions of myeloid cell through immune-  
55 metabolic reprogramming (10). LDs facilitate hosts to combat pathogens' infections  
56 through selectively recruiting immune proteins (11, 12). Recently, a study indicated that  
57 mammalian LDs respond to bacterial lipopolysaccharide and function as innate immune  
58 hubs to coordinate host defense and cell metabolism (13). However, the role of LDs as  
59 pro- or anti-inflammatory modulators is still controversial (14), due to fact that LDs are  
60 highly dynamic organelles. The number, size and anchored proteins of LDs change  
61 quickly in response to infection or stress (15-17). These evidences also indicate that the  
62 status of LDs should be tightly controlled. Defects in the biogenesis and mobilization  
63 of LDs not only result in lipotoxicity (18, 19) but also exacerbate inflammatory  
64 responses and organelles dysfunction (20, 21). However, the role and dynamic pattern  
65 of LDs during immune process is still barely described. Especially, the factors  
66 mediating the transformation of LDs underlying immunometabolic switches have not  
67 been well identified.

68

69 LDs are non-homogenous organelles, which accommodates hundreds of variable  
70 proteins (22, 23). However, Perilipins (Plins) are the most prominent proteins that span  
71 the surface of LDs (24, 25). Each LD is usually decorated by two or more members of  
72 Perilipin family proteins and no LDs without perilipins have been identified in  
73 mammalian cells so far (26). There are five major perilipins in mammalian, named  
74 Perilipin1-5. These Perilipins differ in the expression and cellular localization in  
75 different tissues and have essential roles in the regulation of LDs' structure and  
76 morphology (27, 28). However, whether Perilipins get involved in immune functions,  
77 probably through mediating LDs' reconfiguration, is still obscure. In human or mouse  
78 adipocyte tissue, Perilipin1 deficiency leads to uncontrollable LDs lipolysis and  
79 infiltration of inflammatory cells (29, 30). Inhibition of lipases, such as adipose  
80 triglyceride lipase (ATGL) or hormone-sensitive lipase (HSL), can alleviate this  
81 metaflammation (31, 32). *Plin1* knockout also promotes secretion of prostaglandins,  
82 the pro-inflammatory lipid metabolites, and elevates pro-inflammatory M1-type  
83 adipose tissue macrophages in mice (33). In innate immunity, the expression and  
84 localization of Perilipins on LDs changed in response to LPS stimulation, which  
85 subsequently affected antimicrobial capacity (13). These evidences suggest a link  
86 between Perilipins and immunometabolic regulations.

87

88 *Drosophila melanogaster* has emerged as a productive organism to investigate  
89 immunometabolism, due to the advantages of powerful genetic manipulation and

90 highly conserved mechanisms in both innate immunity and metabolism (34-36).  
91 Especially, the fat body (analogous to human liver and adipose tissue), as a major organ  
92 mediating systemic innate immunity, is an ideal place for studying the interaction  
93 between metabolism and inflammation of LDs, due to its richness in LDs (37, 38).  
94 Furthermore, Perilipins are evolutionarily conserved from fungi to human. Not like  
95 more redundant Plins in mammalian, there are only two Plins in *Drosophila*, Lipid  
96 storage droplet-1 (*lsd1* or *plin1*) and *lsd2* (*plin2*) (39). Plin2 acts to promote lipid storage  
97 and LDs' growth as a barrier for lipase (40-42), while Plin1 modulates protein flux on  
98 LDs (27, 28). They have opposite functions on the control of LDs' morphology (27). In  
99 *Drosophila*, the immune deficiency (IMD) pathway is a dominant innate immune  
100 signaling against Gram-negative bacterial infections, which is homologue to mammalian  
101 NF- $\kappa$ B/TNF pathway (35). Couple studies have revealed that IMD signaling modulate  
102 lipolysis in either fat body or intestine of flies (43, 44). And thus, LDs' accumulation  
103 was once reported in fly gut after IMD activation (17). However, as if LDs adapt to  
104 immune response, whether and how morphological changes occur on LDs remain  
105 unclear. More importantly, the contribution of these adaptive altered LDs to infectious  
106 pathogenesis and the underlying mechanisms mediating by LDs-anchored factors such  
107 as Plins, are still poorly understood.

108

109 In this study, the alteration in morphology and number of LDs were traced dynamically  
110 during bacterial infection. Plin1 was found to respond to IMD action and then modify  
111 LDs' morphology to alleviate inflammatory stress. Our data reveal that adaptive

112 modification of LDs acts as an active modulator of infection-induced pathogenesis.

113

## 114 **Results**

### 115 **Bacterial infection modulates lipid metabolism, and particularly alters** 116 **morphology of lipid droplets (LDs) in the fat body.**

117 In *Drosophila*, the fat body is not only a central organ mediating systemic immune  
118 responses, but also the epicenter for lipid metabolism. Thus, to decipher the mechanistic  
119 connections between innate immunity and lipid metabolism, the kinetics of fat content  
120 was tested in the fat body of *Drosophila* after systemic infection. *Escherichia. Coli* (*E.*  
121 *coli*), a non-pathogenic Gram-negative bacterium to flies, was used to perform nano-  
122 injection to infect adult male fruit flies. The immune deficiency (IMD) pathway is a  
123 dominant innate immune signaling against Gram-negative bacterial infections that  
124 regulates Relish/NF- $\kappa$ B-dependent transcription of AMPs, such as *Diptericin* (*Dpt*)  
125 (35). Thus, by measuring the expression level of *Dpt*, IMD signaling activity could be  
126 monitored (45, 46). In consistent with previous report that *E.coli* injection resulted in a  
127 transient innate immune response within 48 hour post infection (hpi)(47), a gradient  
128 increase in IMD activity in the fat body was observed from 0 hpi to 12 hpi, and then  
129 this activity subsided to the basal level after 48 hpi (**Fig.1A**). Interestingly, compared  
130 to mock injection control (**Supplementary Fig. S1A**), the fat levels in the fat body of  
131 flies with *E.coli* infection steadily increased from 4 hpi to 16 hpi and then almost  
132 recovered after 48 hpi (**Fig. 1A**). Therefore, these results suggest a link between lipid  
133 metabolism and IMD signaling activation in the fat body of flies.

134

135 LDs are the main site for lipid metabolism, mobilization and storage (48), which  
136 prompted us to investigate whether LDs change in the fat body in response to bacterial  
137 infection. BODIPY staining of fat body cells revealed that compared to PBS injection  
138 group (**Fig. 1B and 1C**), *E. coli* infection increased the percentage of intracellular small  
139 LDs (diameter < 2  $\mu\text{m}$ ) at 6 hpi (**Fig. 1B and 1C**). And then, LDs grew bigger at 16 hpi  
140 as indicated by the decrease in the percentage of small LDs and concurrent increase in  
141 the percentage of large LDs (diameter > 4  $\mu\text{m}$ ). Finally, this size distribution of LDs  
142 was restored to basal levels at 24 hpi (**Fig. 1B and 1C**). Accordingly, the average size  
143 of LDs in fat body cells had the similar changing trend (**Fig.1D**). These results indicate  
144 that small LDs are prone to fuse into bigger ones during the initial 16 h after *E. coli*  
145 infection.

146

#### 147 **The reconfiguration of LDs requires IMD signaling activation.**

148 To determine whether IMD signaling activation rather than live bacterial growth is  
149 responsible for the modification of LDs during infection, heat-killed *E. coli* was applied  
150 to repeat infection in wild type flies. The elevated fat levels in fat bodies were still  
151 observed at 12 hpi in WT flies (**Fig. 2A**). In *Drosophila*, peptidoglycan (PGN) from  
152 Gram-negative bacteria can bind to the receptor of PGRP-LC to active IMD signaling  
153 through transcriptional regulator Relish (35). Thus, the flies with homozygous mutation  
154 of *PGRP-LC* (*PGRP-LC $\Delta 5$* ) or *relish* (*relish<sup>E20</sup>*) was used for infection. In contrast to  
155 wild type flies, the phenotype of elevated fat contents in fat bodies disappeared and  
156 even reversed in these mutant flies at 12h post heat-killed *E.coli* injection (**Fig. 2B**).  
157 Moreover, IMD signaling deficiency also restricted the increase in LDs size at 16 hpi,

158 compared to WT controls (**Fig. 2C and D**). Therefore, these results suggest that IMD  
159 signaling activation is required to modify LDs' morphology in response to bacterial  
160 infection.

161

162

163 ***plin1* is involved in LDs' morphological change induced by IMD activation.**

164 Perilipins (Plins), a group of constitutive proteins that span the surface of LDs, were  
165 reported to regulate lipid mobilization and LDs' morphology (27, 28). There are two  
166 Perilipins in *Drosophila*, Plin1 and Plin2. To explore whether Plins are involved in the  
167 regulation of LDs' reconfiguration in response to immune activation, their time-course  
168 expression was detected in the fat body by real-time PCR. *E. coli* infection induced a  
169 significant downregulation of *plin1* mRNA levels at 4 hpi, which was then gradually  
170 restored to basal levels at 24 hpi (**Fig.3A**). The changing trend of *plin1* expression  
171 seemed to be negatively correlated with the changes in LD's size and IMD activity.  
172 However, the expression level of *plin2* was only slightly tuned down at 4hpi and back  
173 to normal at 12h after *E. coli* infection (**Supplementary Fig.2A**). Previous study have  
174 shown that deficiency of *plin2* resulted in reduced rather than enlarged size of LDs (27).  
175 Therefore, these results indicate a potential role of *plin1* in the regulation of LDs'  
176 morphology in response to IMD activation. Furthermore, either deficiency of *plin1* by  
177 mutation (*plin1*<sup>38</sup>) or specific knockdown of *plin1* in fat body (*UAS-plin1 RNAi* driven  
178 by *ppl-GAL4*) promoted the formation of large LDs. Whereas, ectopic expression of  
179 *plin1* in the fat body led to the accumulation of much smaller LDs, compared with



180 controls (**Fig. 3B**). These results were reminiscent of previous studies that *Plin1* may  
181 function to enhance lipid mobilization and inhibit LD coalescence (49).

182

183 Martik (MRT) /Putzig (PZG) complex, a chromosome remodeling complex, has been  
184 reported to suppress *plin1* at transcriptional level (49). The mRNA levels of both *mrt*  
185 and *pzg* were upregulated in the fat body after bacterial infection (**Fig. 3C and 3D**).

186 Interestingly, homologous alignment showed that at least one conserved binding motif  
187 of Relish existed in the promoter region of both *mrt* and *pzg* genes across *Drosophila*  
188 species with different evolutionary ages (**Supplementary Fig. S3A and S3B**). This

189 implies a potential regulation of these genes by IMD/Relish. Peptidoglycan (PGN)  
190 derived from gram-negative bacteria can activate IMD signaling in *Drosophila* S2\*  
191 cells *in vitro* (50). The treatment of PGN enhanced luciferase activity controlled by the

192 promoter of *mrt* or *pzg* in S2\* cells, which was blocked by the knockdown of Relish  
193 using dsRNA (51) (**Fig. 3E and 3F**). Additionally, two Relish binding motifs in  
194 truncated *mrt* promoter region (T-*mrt*(*Rel*), -870 to +1bp, in **Supplementary Fig. S3C**)

195 were required for *mrt* transcription (**Fig. 2G**), because PGN treatment didn't enhance  
196 T-*mrt*-Luc activity any more when these two sites were removed (**Fig. 2G**). Thus, these

197 results suggest that suppression of *plin1* by IMD signaling might be through  
198 upregulation of *mrt/pzg*. All together, these results provide an explanation for LDs'  
199 growth in the early stages of transient IMD activation.

200

201 **Plin1 compromises host protection against bacterial infection.**

202 Naturally, whether Plin1 participated in the defense of bacterial infection was tested  
203 next. Since *E. coli* is non-pathogenic to flies, another Gram-negative bacterium,  
204 *Salmonella. Typhimurium* (*S. typhimurium*), which is a deadly pathogen for flies (52),  
205 was used to evaluate Plin1 function on immune defense. Compared to genetic controls,  
206 either *plin1* deficiency (*plin1*<sup>38</sup>) (**Fig. 4A and 4B**) or fat body-specific knockdown of  
207 *plin1* (*ppl-GAL4>UAS-plin1RNAi*) (**Fig. 4C and 4D**) significantly prolonged the  
208 survival rate and slightly reduced bacterial loads (colony-forming units, CFUs) after *S.*  
209 *typhimurium* septic infection, indicative of enhanced resistance against bacterial  
210 infection. Conversely, ectopic expression of *plin1* in the fat body (*ppl-GAL4>UAS-*  
211 *plin1*) led to a dramatic increase in mortality rate of flies infected with *S. typhimurium*  
212 (**Fig. 4E** , Reducing infection OD because O.E.*plin1* flies died too quickly.), or even  
213 by non-pathogenic *E. coli* (**Fig. 4G**), possibly due to uncontrolled bacterial growth (**Fig.**  
214 **4F and 4H**). However, it's worthy to note that deficiency of *plin1* did not affect anti-  
215 microbial peptides (AMPs) (*Diptericin*, *Dpt*; *AttacinA*, *AttA*) response upon *E. coli*  
216 infection (**Supplementary Fig. S4A**), but specifically improved *Dpt* expression upon  
217 *S. typhimurium* infection (**Supplementary Fig. S4B**). Interestingly, overexpression of  
218 *plin1* dampened AMPs response in both *E. coli* and *S. typhimurium* infections  
219 (**Supplementary Fig. S4C and S4D**). Taken together, these results suggest that  
220 adaptive downregulation of *plin1* in response to IMD signaling activation protected the  
221 host against bacterial infections.

222

223 **Plin1-mediated reconfiguration of LDs participates in the homeostasis of**  
224 **intracellular ROS.**

225 The next question is whether downregulated Plin1-induced LDs' growth also benefit  
226 the host against bacterial infection. Sustained immune activation is a high energy-cost  
227 process, which requires active lipolysis and usually leads to excessive reactive oxygen  
228 species (ROS) accumulation due to the release and oxidation of free fatty acids, one  
229 hallmark for inflammatory damages (18, 53). However, LDs' growth could efficiently  
230 reduce the accumulation of free fatty acids, and probably relieve ROS-related tissue  
231 damages (54). As expect, *plin1* deficiency (*plin1*<sup>38</sup>) (**Fig.5A and A1**) or knockdown  
232 (*UAS-plin1RNAi* driven by *ppl-GAL4*)( **Fig. 5B and B1**), which promoted LDs growth,  
233 accompanied with a much lower level of ROS than that of control. In contrast,  
234 overexpression of *plin1* in fat body cells (*ppl-GAL4*> *plin1*) , which transformed LDs  
235 into smaller ones, markedly increased ROS intensity (**Fig. 5B and B1**). These results  
236 suggest a correlation between the size of LDs and the intensity of ROS accumulation  
237 in fat body cells. To further support this notion, we skewed ROS metabolism in fat  
238 bodies through knockdown of superoxide dismutase genes (*sod1* or *sod2*) or catalase  
239 gene (*cat*), all of which encode enzymes for intracellular ROS clearance (55, 56). All  
240 these flies (*ppl-GAL4*>*UAS-sod1-RNAi*, *sod2-RNAi* or *cat-RNAi*) contained elevated  
241 ROS levels (**Fig.5C and 5D**) and compensatory LD's growth in fat bodies (**Fig. 5E**  
242 **and 5F**). If blocking the large LDs' formation by simultaneous overexpression of *plin1*  
243 in these genetic backgrounds (**Fig. 5E and 5F**), much higher ROS accumulation was  
244 observed in fat bodies (**Fig. 5C and 5D**). All together, these results suggest that Plin1-  
245 controlled LDs' reconfiguration takes part in antioxidative functions.

247 **Downregulated Plin1 in response to IMD activation benefits flies against oxidative**  
248 **stress associated with bacterial infection.**

249 The activation of immune signaling, such as NF- $\kappa$ B or TNF signaling, often associates  
250 with ROS-induced inflammatory stress (53, 57). A transgenic allele with a *gstD-GFP*  
251 insertion was utilized to monitor ROS activity *in vivo* by measuring GFP intensity (58).  
252 Indeed, in *Drosophila*, infection either by non-pathogenic *E.coli* or by strong  
253 pathogenic *S. typhimurium* induced an obvious increase of intracellular ROS levels in  
254 the fat body (**Fig. 6A and 6B**). These results support the link between bacterial infection  
255 and accumulation of intracellular oxidative stress. If we removed this infection-  
256 associated intracellular ROS by feeding flies with N-acetylcysteine (NAC), a widely-  
257 used ROS scavenger, the survival of flies after pathogenic *S. typhimurium* infection was  
258 improved, compared to non-infected controls (**Fig. 6C**). It's worthy to note that feeding  
259 flies with NAC at 12 h, not 0h, post *S. typhimurium* infection, benefited the fitness of  
260 flies much better. It's likely that at time point of 12 hpi, excessive ROS accumulation  
261 had already developed, and initiate ROS of early infectious stage is useful for defense  
262 against bacteria (59, 60). These results suggest that excessive oxidative stress, which  
263 develops during bacterial infection is harmful for the host.

264

265 Since LDs are major hubs for lipid metabolism in fat body cells and function on ROS  
266 clearance, it promoted us to investigate whether *plin1*-mediated LDs modification is  
267 involved against bacterial infection, probably through regulating intracellular ROS. At  
268 first, we found that elevated ROS levels in wild type fat bodies were diminished in fat

269 bodies of *plin1* deficiency flies (**Fig. 6D and 6E**). Next, a RU486 induced fat body-  
270 specific GAL4 (*GSI06-GAL4*) was used to modulate the expression of *plin1* just before  
271 *S.typhimurium* infection, which exclude the possible effects of *plin1* on the  
272 development of flies. As expect, overexpression or knockdown of *plin1* in the fat body  
273 resulted in a significant decrease or increase in LDs' size, respectively (**Fig. 6F**).  
274 Downregulation of *plin1* prolonged the survival rate after *S.typhimurium* infection (**Fig.**  
275 **6G**), while ectopic expression of *plin1* shortened the life span dramatically (**Fig. 6H**).  
276 Meanwhile, fluorescent probe 2',7'-dichlorofluorescein diacetate (DCFH-DA) staining  
277 indicated an elevated intracellular ROS levels in *plin1*-overexpression flies and a  
278 reduced ROS levels in *plin1*-knockdown flies during infection (**Fig. 6I and 6I1-2**).  
279 Taken together, these results suggest that large LDs formation contributes to alleviate  
280 intracellular oxidative stress induced by bacterial infection and Plin1 might serve as an  
281 important modulator to promote LDs modification in response to IMD activation.

282

## 283 **Discussion**

284 Metabolic reprogramming of lipids has been widely reported to be associated with  
285 immune responses (1, 2, 61). As a major intracellular organelle for lipid metabolism  
286 and storage, LDs also seem to be involved in immune processes. Immune stimulation  
287 either by infection with bacteria (62, 63), virus (64-66), fungus(67) or protozoan  
288 parasites (68), or by cytokines inoculation (69, 70) may promote the biogenesis of LDs  
289 in mammalian leukocytes. Recently, Hash et al also reported that LDs are infection-  
290 inducible organelles in the gut of *Drosophila* at a certain timepoint after infection (17).

291 Bosch et al further indicated LDs recruit antimicrobial proteins in response to LPS and  
292 function as innate immune hubs (13). However, the status and morphology of LDs  
293 change rapidly *in vivo*. Whether this dynamic transformation of LDs in response to  
294 immune stimulation is seldom described. Whether adaptive morphological change of  
295 LDs plays active rather than passive roles in pathogenesis, and key regulators linking  
296 LDs' reconfiguration and infection still need further investigated.

297

298 In this study (**Fig.7**), we carefully traced the time-course morphogenesis of LDs in the  
299 fat body along with the dynamic curve of IMD signaling activity. We found that  
300 transient IMD activation by bacterial infection promoted LDs' growth in the fat body  
301 within 12hpi. Both LDs' size and fat levels in the fat body was maximum when IMD  
302 activity almost achieved its peak. Previous studies show that transcriptional levels of  
303 most triglyceride synthesis genes are suppressed during the initial phase of infection  
304 (71, 72), suggesting that the substrates for LDs' biogenesis in the fat body were  
305 probably imported lipids rather than *de novo* synthesized fatty acids, and IMD signaling  
306 activation is required for this process. Detailed analysis showed that *plin1*  
307 downregulation is critical for LDs' growth in response to transient IMD activation,  
308 considering its expression was suppressed by IMD/Relish activated MRT/PZG  
309 complex. Although the immune response is an energy-cost process, the fat content in  
310 specific tissue such as fat body is surprisingly increasing at the early stage of immune  
311 activation. These findings prompt us to imagine that LDs' biogenesis is likely an active  
312 host adaptation to immune challenges. To further support this hypothesis, we found that

313 enlarged LDs benefit the host against intracellular ROS-mediated oxidative stress  
314 induced by bacterial infection.

315

316 Excessive ROS accumulation is often the main cause of inflammation/infection-  
317 induced cellular damages. In fact, biological processes such as cancer, neural activity,  
318 and inflammation are all energy-intensive, rely on robust fat metabolism, which  
319 releases large amounts of free fatty acids. The excess accumulation of free fatty acids  
320 in the cytoplasm promotes lipotoxicity and ROS-induced oxidative stress (73-75). The  
321 high levels of intracellular ROS can further promote lipolysis and free fatty acids  
322 release (76). This vicious circle finally drives the host to enter a severe metaflammatory  
323 state during chronic hyperinflammation, and consequently shorten lifespan. A recent  
324 study showed that renal purge of hemolymphatic lipids can efficiently prevent ROS-  
325 mediated tissue damage during inflammation (77). A similar antioxidant function of  
326 LDs was also reported in neuronal stem cell niche (78) and in cancer cells (79). In our  
327 study, blocking the breakdown and promoting the growth of LDs by downregulated  
328 *plin1* could efficiently eliminate ROS accumulation and prolong flies' lifespan after  
329 bacterial infection. However, the detailed mechanisms how large LDs prefer to prevent  
330 ROS accumulation needs further investigation. One possibility is that the formation of  
331 large LDs sequesters the release of excessive free lipids, which oxidation contributes to  
332 the main source of ROS generation. Another possibility is that the larger the LDs are,  
333 the smaller the contact areas with mitochondria are. As mitochondria provides a major  
334 place for the oxidation of lipid usually supplied by LDs (9), reduced contacts between

335 LDs and mitochondria might be another not-bad way to cut down ROS generation. Thus,  
336 LDs' growth is beneficial for redox homeostasis of the host. The downregulation of  
337 Plin1 to promote the enlargement of LDs might be an effective host adaptation to  
338 resolve inflammation-associated stress in response to immune activation.

339

340 Moreover, large LDs' formation can reduce the opportunity of pathogens to utilize free  
341 fatty acids for their own growth (80-82). This is possibly one reason why *plin1* deficient  
342 flies, owning bigger LDs, had lower bacterial loads after infection. In addition, larger  
343 LDs might contain more resident histones, a cationic protein, which has been reported  
344 to kill bacteria in a previous study (83). In mammals, IFN- $\gamma$  treatment of *M. tuberculosis*  
345 infected bone-marrow derived macrophage (BMDM) can induce the formation of LDs,  
346 in which neutral lipids serve as a source to produce eicosanoids for enhancing host  
347 defense (84). A recent study made a detailed analysis that LDs recruit cathelicidin, a  
348 broad-spectrum antimicrobial peptide, in response to LPS stimulation (13). However,  
349 whether the change of LDs' morphology alters the recruitment of LD-anchored proteins  
350 and underlying molecular and cellular mechanisms need further investigation. In our  
351 study, the reduced expression of genes encoded antimicrobial peptides was also found  
352 when *plin1* overexpression (**Supplementary Fig. S4C and S4D**) and *diptericin* was  
353 upregulated after *plin1* mutant flies infected with bacteria (**Supplementary Fig. S4B**).  
354 These results also suggest that a link between antimicrobial signaling with *plin1* directly  
355 or Plin1-mediated LDs' modification indirectly. However, the large LDs' formation in  
356 response to bacterial infection could in turn benefit the host to combat pathogens



357 actively.

358

359 Plin1 is an important protein factor on the surface of LDs. It has been reported to control  
360 the mobilization of lipids on LDs' surface by recruiting kinds of enzymes (85, 86) and  
361 sufficient to alter the morphology of LDs (27). In this study, we found that the  
362 expression of *plin1* rather than *plin2* preferred to be regulated by innate immune  
363 signaling. This provokes us to conceive that Plin1 may serve as a bridge to link  
364 immunity and lipid metabolism through modification of LDs. In response to transient  
365 immune activation, adaptative enlarged LDs benefit the host against pathogens and  
366 inflammation-induced stress. The alternation of the levels of mammalian PLINs protein  
367 on LDs' surface was once mentioned after LPS stimulation (13). Our study provide a  
368 possibility that perilipins might response to immune signals and play an active role in  
369 infectious pathogenesis through transforming LDs. It is worthy in the future to trace  
370 and dissect the dynamic protein compositions on the surface of LDs along the different  
371 stages of inflammation, especially the proteins interact with Plin1. In summary, we  
372 found that the Plin1-mediated LDs' morphological alteration is not only an adaptive  
373 consequence after bacterial infection, but also actively contributes to pathogenic  
374 regulation. Therefore, reconfiguration of LDs may provide a potential therapeutic target  
375 for resolution of inflammation.

376

## 377 **Materials and Methods**

### 378 ***Drosophila* stocks and bacterial strain.**

379 All flies were propagated at 25°C on standard cornmeal food (1 L food contains 77.7 g

380 cornmeal, 32.19 g yeast, 10.6 g agar, 0.726 g CaCl<sub>2</sub>, 31.62 g sucrose, 63.2 g glucose, 2  
381 g potassium sorbate and 15 ml 5% Tegosept), 30%-55% humidity with a 12h/12h  
382 light/dark cycle. Fly resources that were used in this study as follows: *w*<sup>1118</sup> were used  
383 as wild-type controls if no additional indication. *plin1*<sup>38</sup>, *UAS-plin1* mcherry, *UAS-plin1*  
384 *RNAi* and *ppl-GAL4* were kindly gifted from Dr. Xun Huang (Institute of Genetics and  
385 Developmental Biology, CAS). *UAS-gstD-GFP* was kindly gifted from Dr. ZhiWei Liu  
386 (Shanghai Ocean University). *w*<sup>1118</sup>, *w*[1118]; *P*{*w*[+*mWhs*] = *Switch1*}106, *PGRP-L*<sup>4</sup>  
387 <sup>5</sup>, *Relish*<sup>E20</sup> were obtained from Bloomington stock center. All flies used in this study  
388 were male. Two bacterial strain, *E. coli* (*DH5a*) and *S. typhimurium* (*SR-11*) (a gift from  
389 Dr. ZhiHua Liu, Institute of Biophysics, CAS) were used in this study.

390

### 391 Cloning and double-strand RNAs

392 To construct the *mrt* and *pzg* reporter vector (*mrt*-luc and *pzg*-luc), the *mrt* and *pzg*  
393 promoter sequence (about -1500 bp or -1000 bp to 0 bp) was PCR amplified from  
394 *Drosophila* genomic DNA and introduced into *pGL3* vector (Progema) at HindIII  
395 restriction site by using recombination technology (Hieff Clone® Plus One Step  
396 Cloning Kit, YEASEN). All the plasmid constructs were verified by nucleotide  
397 sequencing. *pAC5.1*-renilla plasmid as a normalized reporter. Double-stranded RNAs  
398 (dsRNAs) against relish or GFP used in the luciferase reporter assay were synthesized  
399 using MEGAscript T7 kit (Invitrogen). Primers used for PCR amplification are listed  
400 in Supplementary Table 1.

401

### 402 Infection and survival rate counting

403 Bacterial strains used in this study are *E. coli* (*DH5a*) and *Salmonella typhimurium* (*S.*  
404 *typhimurium*). Two days before infection, both bacteria from glycerol stocks were  
405 streaked onto Luria Broth (LB) agar plates and grown overnight at 37°C. The plate  
406 could be stored at 4 °C for up to 1 week. A single colony was inoculated to 6 ml fresh  
407 LB medium and grown at 37°C with shaking (200 rpm). Grow the bacteria to an OD<sub>600</sub>  
408 of 0.7 to 0.8 (about 3.5 hours). The bacterial culture was pelleted with sterile phosphate-  
409 buffered saline (PBS) to the desired concentration. We injected 50.6 nl of bacterial  
410 suspension into dorsal prothorax of each fly with Nanoject II injector (Drummond). All  
411 flies used were 1 week old after eclosion. The final optical density (O.D. / ml) at 600  
412 nm for injection were *E. coli* (O.D. 10) and *S. typhimurium* (O.D. 6 or O.D. 3). For  
413 *E. coli* infection, each fly obtained about 1x10<sup>6</sup> CFUs. For *S. typhimurium* infection,  
414 each fly obtained the lower dose (about 2x10<sup>5</sup> CFUs) or the higher dose (about 1x10<sup>6</sup>  
415 CFUs) according to the experiment design. Infected flies about 23 per vial were  
416 maintained at 25°C. Death was recorded at the indicated time point, and alive flies were  
417 transferred to fresh food every day for the survival analysis and CFUs assay.

418

### 419 Bacterial loads assay

420 To monitor bacterial loads of the flies during infection, the number of colony forming  
421 units (CFUs) grown on LB agar plate was determined as follow: 5 living flies were  
422 randomly collected in a 1.5 ml EP tube, rinsed with 70% ethanol two times by vortex  
423 for 10s to sterile the surface adherent bacteria, then rinsed with sterile deionized water

424 two times by vortex for 10 s, and then homogenized in 200  $\mu$ l of sterile PBS with three  
425 fly body volumes of ceramic beads (diameter: 0.5 mm) in the Minilys apparatus (Bertin  
426 TECHNOLOGIES) at highest speed for 30 s. The suspensions obtained were then  
427 serially diluted in PBS and plated on LB agar. Specially noted for *S. typhimurium*  
428 plating, PBS was substituted with PBS + 1% Triton X-100. For the bacterial load at  
429 zero time point, flies were allowed to rest for 10 min after bacterial injection before  
430 plating as described above. The agar plate was maintained at 37°C for 18 hours before  
431 CFUs counting. CFUs were log<sub>10</sub> transformed.

432

### 433 **Cell culture, transfection and luciferase assay**

434 S2\* cells (a gift from Dahua Chen, Institute of Zoology, CAS) were maintained in  
435 Drosophila Schneider's Medium (Invitrogen) supplemented with 10% heat-inactivated  
436 fetal bovine serum (Gibco), 100 units/ml of penicillin, and 100 mg/ml of streptomycin  
437 at 28°C. Transient transfection of various plasmids, dsRNA was performed with  
438 lipofectamine 3000 (Invitrogen), according to the manufacturer's manual. Luciferase  
439 reporter assays were carried out using a dual-luciferase reporter assay system  
440 (Promega). Where indicated, cells were treated with PGN (35  $\mu$ g/ $\mu$ l, 6 h) purified from  
441 *Erwinia carotovora carotovora* 15 (*Ecc15*) referring to previous study(87).

442

### 443 **qRT-PCR**

444 For quantification of mRNA level, about 20 flies carcass/fat body tissue were dissected  
445 in sterile PBS buffer on ice at indicated time points post infection, immediately  
446 homogenized in 200  $\mu$ l cold TRIzol with three fly body volumes of ceramic beads  
447 (diameter: 0.5 mm), then supplied additional 300  $\mu$ l TRIzol to reach total 500  $\mu$ l volume  
448 and samples were stored at -80°C. RNA extraction was referred to the manual of  
449 commercial kit (Magen, Hipure Total RAN Plus Micro Kit), this kit can effectively  
450 remove genomic DNA contamination. cDNA was synthesized by using the kit (abm,  
451 5X All-In-One MasterMix) with total 1 $\mu$ g isolated RNA as template in a 20  $\mu$ l reaction  
452 system. Quantitative real-time PCR (qRT-PCR) was performed using a SYBR green kit  
453 (abm, EvaGreen supermaster Mix) on an ABI 7500 or ViiATM 7 thermocycler (Life  
454 Technology). Samples from at least four independent biological replicates per genotype  
455 were collected and analyzed. House-keeping gene rp49 as the reference gene for data  
456 normalization. Primer data for qRT-PCR are provided in Supplementary Table 1.

457

### 458 **Lipid droplet staining and counting**

459 For lipid droplet staining, adult male carcass/fat body tissues were dissected and fixed  
460 in 4% fresh prepared paraformaldehyde (PH=7.5) in PBS for 10 min on ice. Tissues  
461 were then rinsed twice with PBS (3 min each time), then incubated in PBS containing  
462 1 $\mu$ g/ml of BODIPY 493/503(Invitrogen) dye or 0.5  $\mu$ g/ml Nile Red (Sigma) for 30 min  
463 on ice, DAPI (1 $\mu$ g/ $\mu$ l, final concentration) was added to stain nuclei at last 5 mins of  
464 staining process. After staining, tissues were rinsed three times with PBS (3 mins each  
465 time), then mounted in mounting medium (Vector, H-1000) for microscopy analysis.  
466 To quantify the average lipid droplet size, the average diameter of the three largest lipid  
467 droplets per cell was measured generally, with the exception of *plin1* deficiency

468 associated flies, we measured their biggest lipid droplets in one cell (27). 30 fat body  
469 cells of each genotype fly randomly selected from eight confocal images were used to  
470 analysis the lipid droplet size. To count the size distribution of lipid droplets, the  
471 average percentage of the indicated size range of lipid droplets per cell from 30 fat body  
472 cells were determined by using the “Analyze Particles” tool embedded in ImageJ  
473 software (<https://imagej.nih.gov/ij/>). To quantify the fluorescence intensity of GFP on  
474 the surface of lipid droplets, confocal images acquired from eight fat bodies were  
475 measured by ImageJ software.

476

### 477 **Glyceride detection**

478 Glyceride amounts were measured using a TG Quantification Kit (BIOSINO, TG kit).  
479 Briefly, for whole body glyceride quantification, groups of 12 one-week old male flies  
480 were collected and weighted (about 10 mg) in a 1.5 ml EP tube, then immediately stored  
481 at -80°C for subsequent assay. Stored flies were homogenized in 200 µl lysis buffer  
482 (10mM KH<sub>2</sub>PO<sub>4</sub>, 1mM EDTA, PH=7.4) with three fly body volumes of ceramic beads,  
483 and inactivated in water bath at 75°C for 15 min. The inactivated homogenate was  
484 homogenized again for 30 s and kept on ice ready for assay. For each glyceride  
485 measurement, 3 µl of homogenate was incubated with 250 µl reaction buffer at 37°C  
486 for 10 min. After removal debris by centrifugation (2000 rpm, 2 min), 150 µl of clear  
487 supernatant was used to perform a colorimetric assay in 96 well plate (Corning® Costar)  
488 for absorbance reading at 505 nm. Glyceride level was normalized with fly weight in  
489 each homogenate (unit: nmol/mg.fly). For fat body glyceride quantification, 25 fly’s  
490 carcass/fat body tissues were dissected and following assay as described above.  
491 Glyceride level was normalized with per 25 flies (unit: nmol/25.fly).

492

### 493 **RU486 treatment**

494 RU486 induction was described as before (88). Briefly, A 10 mg/ml stock solution of  
495 RU486 (mifepristone; Sigma) was dissolved in DMSO. Appropriate volumes of RU486  
496 stock solution was diluted with water containing 2% ethanol to final concentration of  
497 50 µg/ml. 100 µl of the diluted RU486 solution was dipped onto the surface of fresh  
498 food in vials (Diameter: 2 cm). The vials were then allowed to dry at room temperature  
499 for half day or 4°C for overnight. Flies were transferred to RU486-contained food and  
500 raised in 25°C and fresh food was changed every two days.

501

### 502 **NAC Treatment**

503 N-acetyl-L-cysteine (NAC) (Beyotime) fresh solution was prepared by dissolving 0.5  
504 g of NAC powder in 10 ml distilled water, the solution could be aliquoted into 1 ml per  
505 EP tube and frozen or stored at -80 °C. 100 µl of NAC solution was dipped onto the  
506 surface of fresh food in vials (Diameter: 2 cm). The vials were then allowed to dry at  
507 room temperature for half day or 4°C for overnight. Flies were transferred to NAC-  
508 contained food and raised in 25°C and fresh food was changed every day.

509

### 510 **ROS detection**

511 We used two methods to detect ROS in fat body, which are *gstD-GFP* reporter flies and

512 dichlorofluorescein diacetate (DCFH-DA) labeling. The oxidative stress reporter  
513 construct *gstD-GFP* for evaluating cellular ROS levels has been describe before (58).  
514 Briefly, the carcass/fat body of transgenic flies containing a *gstD-GFP* reporter  
515 construct were dissected in sterile PBS, fixed in 4% formaldehyde for 10 min on ice,  
516 rinsed twice with ice-chilled PBS (3 min each time), then the flaky fat body cells  
517 attached to the inner carcass shell were dissected out to mount and confocal image  
518 (Vector, H-1000). DCFH-DA (Beyotime, Reactive Oxygen Species Assay Kit) labeling  
519 of fresh dissected carcass/fat body tissues was performed according to the  
520 manufacturer's manual, which based on the ROS-dependent oxidation of DCFH-DA to  
521 fluorescent molecule 2'-7'dichlorofluorescein (DCF). In brief, the tissues were  
522 incubated with PBS containing 20  $\mu$ M DCFH-DA for 30 min at 30°C, washed with  
523 sterile PBS for three times (3 min each) to remove free DCFH-DA that do not uptake  
524 by the cell, then the flaky fat body cells attached to the inner carcass shell immediately  
525 were dissected out to mount and confocal image (Vector, H-1000). It should be noted  
526 that the slices were confocal imaged using the exact same settings for control and  
527 experimental groups. The fluorescence intensity is proportional to the ROS levels,  
528 fluorescence intensity of GFP or DCF was quantified by using ImageJ software.

529

### 530 **Microscopy and software**

531 LSM700 (Leica) and Olympus FV-1200 confocal laser scanning microscopy were used  
532 for imaging. Captured images were analyzed by implemented soft respectively. ImageJ  
533 (<https://imagej.nih.gov/ij/>) was used for analysis of fluorescence intensity and lipid  
534 droplets size.

535

### 536 **Statistical analyses**

537 All replicates are showed as the mean  $\pm$  SD or mean with range. Statistical significance  
538 was determined using a paired Student's t-test for two measurements, one-way ANOVA  
539 (Tukey's HSD) with a multiple t-tests and Multiple t-tests for pairwise comparisons.  
540 Kaplan–Meier test for survival curves comparison. All data processing was used with  
541 GraphPad Prism 7.0.

542

543 *Sample size choice.* The sample size was determined according to the number of data  
544 points. Batches of experiment were carried out to ensure repeatability and the use of  
545 enough animals for each data point.

546

547 *Randomization.* Measures were taken to ensure randomization. Each experimental  
548 batch contained more animals than the number of data points, to ensure randomization  
549 and the accidental exclusion of animals. In vitro analyses were usually performed on a  
550 specimen from animals at each data point to ensure a minimum of three biological  
551 replicates.

552

553 *Blinding.* Data collection and data analysis were routinely performed by different  
554 people to blind potential bias. All measurement data are expressed as mean  $\pm$  s.d. to  
555 maximally show derivations, unless otherwise specified.

556

## 557 **Acknowledgements**

558 We thank Drs. Xun Huang (Institute of Genetics and Developmental Biology, CAS) for  
559 providing stocks of *plin1*<sup>38</sup>, *UAS-plin1-mcherry*, *UAS-plin1-RNAi* flies and valuable  
560 comments; Zhiwei Liu (Shanghai Ocean University) for providing stock of *UAS-gstD-*  
561 *GFP*; Zhihua Liu (Institute of Biophysics, CAS) for providing *S. typhimurium (SR-11)*  
562 strain; Ms. Song-qing Liu (Institute of Biophysics, CAS) for fly food preparation and  
563 stock maintenance. We thank Drs. Hui Xiao, Parag Kundu and Philippe Sansonetti (IPS,  
564 CAS) and Chengshu Wang (SIPPE,CAS) for comments and manuscript polishment.  
565 This work was supported by grants from the Strategic Priority Research Program of the  
566 Chinese Academy of Sciences to H.T (XDB29030301), the National Natural Science  
567 Foundation of China to L.P (31870887) and J.Y (31670909) and Shanghai Municipal  
568 Science and Technology Major Project to L.P (2019SHZDZX02). L.P is a fellow of  
569 CAS Youth Innovation Promotion Association (2012083).

570

## 571 **Author's contributions**

572 Conceptualization, L.W., J.L. and L.P.; Methodology and Validation, L.W., J.L., L.S.,  
573 K.Y. and L.P.; Formal Analysis, L.W. J.L., J.Y., and L.P.; Investigation, L.W., J.L. and  
574 L.P.; Resources, L.P.; Writing-Original Draft, L.W. and L.P.; Writing -Review & Editing,  
575 L.P.; Supervision, H.T. and L.P.; Funding Acquisition, J.Y., H.T. and L.P.

576

## 577 **DECLARATION OF INTERESTS**

578 The authors declare no competing interests.

579

## 580 **References**

- 581 1. Hotamisligil G. 2017. Foundations of Immunometabolism and Implications for Metabolic  
582 Health and Disease. *Immunity* 3:406-420.
- 583 2. O'Neill LA, Kishton RJ, Rathmell J. 2016. A guide to immunometabolism for immunologists. *Nat*  
584 *Rev Immunol* 16:553-65.
- 585 3. Arita M. 2012. Mediator lipidomics in acute inflammation and resolution. *J Biochem* 152:313-  
586 9.
- 587 4. Serhan CN, Chiang N, Dalli J, Levy BD. 2014. Lipid mediators in the resolution of inflammation.  
588 *Cold Spring Harb Perspect Biol* 7:a016311.
- 589 5. Walpole GFW GS, Westman J. 2018. The Role of Lipids in Host–Pathogen Interactions. *IUBMB*  
590 *Life* 5:384-392.
- 591 6. Murphy D. 2001. The biogenesis and functions of lipid bodies in animals, plants and  
592 microorganisms. *Prog Lipid Res* 5:325-438.
- 593 7. Tauchi-Sato K, Ozeki S, Houjou T, Taguchi R, Fujimoto T. 2002. The surface of lipid droplets is a  
594 phospholipid monolayer with a unique Fatty Acid composition. *J Biol Chem* 277:44507-12.
- 595 8. Walther TC, Farese RV, Jr. 2012. Lipid droplets and cellular lipid metabolism. *Annu Rev Biochem*  
596 81:687-714.
- 597 9. Olzmann JA, Carvalho P. 2019. Dynamics and functions of lipid droplets. *Nat Rev Mol Cell Biol*  
598 20:137-155.
- 599 10. den Brok MH, Raaijmakers TK, Collado-Camps E, Adema GJ. 2018. Lipid Droplets as Immune  
600 Modulators in Myeloid Cells. *Trends Immunol* 39:380-392.
- 601 11. Hinson ER, Cresswell P. 2009. The antiviral protein, viperin, localizes to lipid droplets via its N-  
602 terminal amphipathic alpha-helix. *Proc Natl Acad Sci U S A* 106:20452-7.
- 603 12. Anand P, Cermelli S, Li Z, Kassan A, Bosch M, Sigua R, Huang L, Ouellette AJ, Pol A, Welte MA,  
604 Gross SP. 2012. A novel role for lipid droplets in the organismal antibacterial response. *Elife*  
605 1:e00003.
- 606 13. Bosch M, Sanchez-Alvarez M, Fajardo A, Kapetanovic R, Steiner B, Dutra F, Moreira L, Lopez JA,  
607 Campo R, Mari M, Morales-Paytuy F, Tort O, Gubern A, Templin RM, Curson JEB, Martel N,  
608 Catala C, Lozano F, Tebar F, Enrich C, Vazquez J, Del Pozo MA, Sweet MJ, Bozza PT, Gross SP,  
609 Parton RG, Pol A. 2020. Mammalian lipid droplets are innate immune hubs integrating cell  
610 metabolism and host defense. *Science* 370.
- 611 14. Pereira-Dutra FS, Teixeira L, de Souza Costa MF, Bozza PT. 2019. Fat, fight, and beyond: The  
612 multiple roles of lipid droplets in infections and inflammation. *J Leukoc Biol*  
613 doi:10.1002/JLB.4MR0119-035R.
- 614 15. Henne WM, Reese ML, Goodman JM. 2018. The assembly of lipid droplets and their roles in  
615 challenged cells. *EMBO J* 37.
- 616 16. Menon D, Singh K, Pinto SM, Nandy A, Jaisinghani N, Kutum R, Dash D, Prasad TSK, Gandotra  
617 S. 2019. Quantitative Lipid Droplet Proteomics Reveals Mycobacterium tuberculosis Induced  
618 Alterations in Macrophage Response to Infection. *ACS Infect Dis* 5:559-569.
- 619 17. Harsh S, Heryanto C, Eleftherianos I. 2019. Intestinal lipid droplets as novel mediators of host-

- 620 pathogen interaction in *Drosophila*. *Biol Open* 8.
- 621 18. Ertunc ME, Hotamisligil GS. 2016. Lipid signaling and lipotoxicity in metaflammation:  
622 indications for metabolic disease pathogenesis and treatment. *J Lipid Res* 57:2099-2114.
- 623 19. Listenberger LL, Han X, Lewis SE, Cases S, Farese RV, Jr., Ory DS, Schaffer JE. 2003. Triglyceride  
624 accumulation protects against fatty acid-induced lipotoxicity. *Proc Natl Acad Sci U S A*  
625 100:3077-82.
- 626 20. Feldstein AE, Werneburg NW, Canbay A, Guicciardi ME, Bronk SF, Rydzewski R, Burgart LJ, Gores  
627 GJ. 2004. Free fatty acids promote hepatic lipotoxicity by stimulating TNF- $\alpha$  expression via  
628 a lysosomal pathway. *Hepatology* 40:185-94.
- 629 21. Summers SA. 2006. Ceramides in insulin resistance and lipotoxicity. *Prog Lipid Res* 45:42-72.
- 630 22. Guo Y, Walther TC, Rao M, Stuurman N, Goshima G, Terayama K, Wong JS, Vale RD, Walter P,  
631 RV. F. 2008. Functional genomic screen reveals genes involved in lipid-droplet formation and  
632 utilization. *Nature* 7195:657-61.
- 633 23. Beller M, Riedel D, Jansch L, Dieterich G, Wehland J, Jäckle H, RP. K. 2006. Characterization of  
634 the *Drosophila* lipid droplet subproteome. *Mol Cell Proteomics* 6:1082-94.
- 635 24. Itabe H, Yamaguchi T, Nimura S, Sasabe N. 2017. Perilipins: a diversity of intracellular lipid  
636 droplet proteins. *Lipids Health Dis* 16:83.
- 637 25. Kimmel AR, Sztalryd C. 2016. The Perilipins: Major Cytosolic Lipid Droplet-Associated Proteins  
638 and Their Roles in Cellular Lipid Storage, Mobilization, and Systemic Homeostasis. *Annu Rev*  
639 *Nutr* 36:471-509.
- 640 26. Sztalryd C, Brasaemle DL. 2017. The perilipin family of lipid droplet proteins: Gatekeepers of  
641 intracellular lipolysis. *Biochim Biophys Acta Mol Cell Biol Lipids* 1862:1221-1232.
- 642 27. Bi J, Xiang Y, Chen H, Liu Z, Gronke S, Kuhnlein RP, Huang X. 2012. Opposite and redundant roles  
643 of the two *Drosophila* perilipins in lipid mobilization. *J Cell Sci* 125:3568-77.
- 644 28. Beller M, Bulankina AV, Hsiao HH, Urlaub H, Jackle H, Kuhnlein RP. 2010. PERILIPIN-dependent  
645 control of lipid droplet structure and fat storage in *Drosophila*. *Cell Metab* 12:521-32.
- 646 29. Gandotra S LDC, Bottomley W, Cervera P, Giral P, Reznik Y, Charpentier G, Auclair M, Delépine  
647 M, Barroso I, Semple RK, Lathrop M, Lascols O, Capeau J, O'Rahilly S, Magré J, Savage DB,  
648 Vigouroux C. 2011. Perilipin Deficiency and Autosomal Dominant Partial Lipodystrophy. *N*  
649 *Engl J Med* 8:740.
- 650 30. Tansey JT, Sztalryd C, Gruia-Gray J, Roush DL, Zee JV, Gavrilova O, Reitman ML, Deng CX, Li C,  
651 Kimmel AR, Londos C. 2001. Perilipin ablation results in a lean mouse with aberrant adipocyte  
652 lipolysis, enhanced leptin production, and resistance to diet-induced obesity. *Proc Natl Acad*  
653 *Sci U S A* 98:6494-9.
- 654 31. Schweiger M, Romauch M, Schreiber R, Grabner GF, Hutter S, Kotzbeck P, Benedikt P, Eichmann  
655 TO, Yamada S, Knittelfelder O, Diwoy C, Doler C, Mayer N, De Cecco W, Breinbauer R,  
656 Zimmermann R, Zechner R. 2017. Pharmacological inhibition of adipose triglyceride lipase  
657 corrects high-fat diet-induced insulin resistance and hepatosteatosis in mice. *Nat Commun*  
658 8:14859.
- 659 32. Cani PD, Amar J, Iglesias MA, Poggi M, Knauf C, Bastelica D, Neyrinck AM, Fava F, Tuohy KM,  
660 Chabo C, Waget A, Delmee E, Cousin B, Sulpice T, Chamontin B, Ferrieres J, Tanti JF, Gibson GR,  
661 Casteilla L, Delzenne NM, Alessi MC, Burcelin R. 2007. Metabolic endotoxemia initiates obesity  
662 and insulin resistance. *Diabetes* 56:1761-72.
- 663 33. Sohn JH, Lee YK, Han JS, Jeon YG, Kim JI, Choe SS, Kim SJ, Yoo HJ, Kim JB. 2018. Perilipin 1 (Plin1)



- 664 deficiency promotes inflammatory responses in lean adipose tissue through lipid dysregulation.  
665 J Biol Chem doi:10.1074/jbc.RA118.003541.
- 666 34. Heier C, Kuhnlein RP. 2018. Triacylglycerol Metabolism in *Drosophila melanogaster*. *Genetics*  
667 210:1163-1184.
- 668 35. Lemaitre B, Hoffmann J. 2007. The host defense of *Drosophila melanogaster*. *Annu Rev*  
669 *Immunol* 25:697-743.
- 670 36. Myllymaki H, Valanne S, Ramet M. 2014. The *Drosophila* imd signaling pathway. *J Immunol*  
671 192:3455-62.
- 672 37. Arrese EL, Soulages JL. 2010. Insect fat body: energy, metabolism, and regulation. *Annu Rev*  
673 *Entomol* 55:207-25.
- 674 38. Kleino A, Silverman N. 2014. The *Drosophila* IMD pathway in the activation of the humoral  
675 immune response. *Dev Comp Immunol* 42:25-35.
- 676 39. Bickel PE, Tansey JT, Welte MA. 2009. PAT proteins, an ancient family of lipid droplet proteins  
677 that regulate cellular lipid stores. *Biochim Biophys Acta* 1791:419-40.
- 678 40. Fauny JD, Silber J, Zider A. 2005. *Drosophila* Lipid Storage Droplet 2 gene (*Lsd-2*) is expressed  
679 and controls lipid storage in wing imaginal discs. *Dev Dyn* 232:725-32.
- 680 41. Grönke S, Beller M, Fellert S, Ramakrishnan H, Jäckle H, Kuhnlein RP. 2003. Control of Fat  
681 Storage by a *Drosophila* PAT Domain Protein. *Current Biology* 13:603-606.
- 682 42. Teixeira Ls, Rabouille C, Rørth P, Ephrussi A, Vanzo NF. 2003. *Drosophila* Perilipin/ADRP  
683 homologue *Lsd2* regulates lipid metabolism. *Mechanisms of Development* 120:1071-1081.
- 684 43. Molaei M, Vandehoef C, Karpac J. 2019. NF-kappaB Shapes Metabolic Adaptation by  
685 Attenuating Foxo-Mediated Lipolysis in *Drosophila*. *Dev Cell* 49:802-810 e6.
- 686 44. Kamareddine L, Robins WP, Berkey CD, Mekalanos JJ, Watnick PI. 2018. The *Drosophila* Immune  
687 Deficiency Pathway Modulates Enteroendocrine Function and Host Metabolism. *Cell Metab*  
688 28:449-462 e5.
- 689 45. Leulier F, Parquet C, Pili-Floury S, Ryu JH, Caroff M, Lee WJ, Mengin-Lecreux D, Lemaitre B.  
690 2003. The *Drosophila* immune system detects bacteria through specific peptidoglycan  
691 recognition. *Nat Immunol* 4:478-84.
- 692 46. Neyen C, Runchel C, Schüpfer F, Meier P, Lemaitre B. 2016. The regulatory isoform rPGRP-LC  
693 induces immune resolution via endosomal degradation of receptors. *Nat Immunol* 17:1150-8.
- 694 47. Vodovar N, Vinals M, Liehl P, Basset A, Degrouard J, Spellman P, Bocard F, Lemaitre B. 2005.  
695 *Drosophila* host defense after oral infection by an entomopathogenic *Pseudomonas* species.  
696 *Proc Natl Acad Sci U S A* 102:11414-9.
- 697 48. Kuhnlein. 2012. Thematic review series: Lipid droplet synthesis and metabolism: from yeast to  
698 man. Lipid droplet-based storage fat metabolism in *Drosophila*. *J Lipid Res* 53(8):1430-6.
- 699 49. Yao Y, Li X, Wang W, Liu Z, Chen J, Ding M, Huang X. 2018. MRT, Functioning with NURF Complex,  
700 Regulates Lipid Droplet Size. *Cell Rep* 24:2972-2984.
- 701 50. Kaneko T GW, Mellroth P, Steiner H, Fukase K, Kusumoto S, Harley W, Fox A, Golenbock D,  
702 Silverman N. 2004. Monomeric and polymeric gram-negative peptidoglycan but not purified  
703 LPS stimulate the *Drosophila* IMD pathway. *Immunity* 20:637-49.
- 704 51. He X, Yu J, Wang M, Cheng Y, Han Y, Yang S, Shi G, Sun L, Fang Y, Gong ST, Wang Z, Fu YX, Pan L,  
705 Tang H. 2017. Bap180/Baf180 is required to maintain homeostasis of intestinal innate immune  
706 response in *Drosophila* and mice. *Nat Microbiol* 2:17056.
- 707 52. Brandt SM, Dionne MS, Khush RS, Pham LN, Vigdal TJ, Schneider DS. 2004. Secreted Bacterial

- 708 Effectors and Host-Produced Eiger/TNF Drive Death in aSalmonella-Infected Fruit Fly. *PLoS Biol*  
709 2:e418.
- 710 53. Morgan MJ, Liu ZG. 2011. Crosstalk of reactive oxygen species and NF-kappaB signaling. *Cell*  
711 *Res* 21:103-15.
- 712 54. Herms A, Bosch M, Ariotti N, Reddy BJ, Fajardo A, Fernandez-Vidal A, Alvarez-Guaita A,  
713 Fernandez-Rojo MA, Rentero C, Tebar F, Enrich C, Geli MI, Parton RG, Gross SP, Pol A. 2013.  
714 Cell-to-cell heterogeneity in lipid droplets suggests a mechanism to reduce lipotoxicity. *Curr*  
715 *Biol* 23:1489-96.
- 716 55. C M Griswold, A L Matthews, K E Bewley, Mahaffey JW. 1993. Molecular Characterization and  
717 Rescue of Acatalasemic Mutants of *Drosophila Melanogaster*. *Genetics* 134(3):781-8.
- 718 56. J P Phillips , S D Campbell, D Michaud, M Charbonneau, Hilliker AJ. 1989. Null Mutation of  
719 Copper-Zinc Superoxide Dismutase in *Drosophila* Confers Hypersensitivity to Paraquat and  
720 Reduced Longevity. *Proc Natl Acad Sci* 86(8):2761-5.
- 721 57. Blaser H, Dostert C, Mak TW, Brenner D. 2016. TNF and ROS Crosstalk in Inflammation. *Trends*  
722 *Cell Biol* 26:249-261.
- 723 58. Sykiotis GP, Bohmann D. 2008. Keap1/Nrf2 signaling regulates oxidative stress tolerance and  
724 lifespan in *Drosophila*. *Dev Cell* 14:76-85.
- 725 59. Ha EM, Oh CT, Bae YS, Lee WJ. 2005. A direct role for dual oxidase in *Drosophila* gut immunity.  
726 *Science* 310:847-50.
- 727 60. Ha EM, Oh CT, Ryu JH, Bae YS, Kang SW, Jang IH, Brey PT, Lee WJ. 2005. An antioxidant system  
728 required for host protection against gut infection in *Drosophila*. *Dev Cell* 8:125-32.
- 729 61. Buck MD, Sowell RT, Kaech SM, Pearce EL. 2017. Metabolic Instruction of Immunity. *Cell*  
730 169:570-586.
- 731 62. Peyron P, Vaubourgeix J, Poquet Y, Levillain F, Botanch C, Bardou F, Daffe M, Emile JF, Marchou  
732 B, Cardona PJ, de Chastellier C, Altare F. 2008. Foamy macrophages from tuberculous patients'  
733 granulomas constitute a nutrient-rich reservoir for *M. tuberculosis* persistence. *PLoS Pathog*  
734 4:e1000204.
- 735 63. D'Avila H, Melo RCN, Parreira GG, Werneck-Barroso E, Castro-Faria-Neto HC, Bozza PT. 2006.  
736 *Mycobacterium bovis* Bacillus Calmette-Guerin Induces TLR2-Mediated Formation of Lipid  
737 Bodies: Intracellular Domains for Eicosanoid Synthesis In Vivo. *The Journal of Immunology*  
738 176:3087-3097.
- 739 64. Samsa MM, Mondotte JA, Iglesias NG, Assuncao-Miranda I, Barbosa-Lima G, Da Poian AT, Bozza  
740 PT, Gamarnik AV. 2009. Dengue virus capsid protein usurps lipid droplets for viral particle  
741 formation. *PLoS Pathog* 5:e1000632.
- 742 65. Barba G HF, Harada T, Kohara M, Goulinet S, Matsuura Y, Eder G, Schaff Z, Chapman MJ,  
743 Miyamura T, Bréchet C. 1997. Hepatitis C virus core protein shows a cytoplasmic localization  
744 and associates to cellular lipid storage droplets. *Proc Natl Acad Sci U S A* 94:1200-5.
- 745 66. Hope RG, Murphy DJ, McLauchlan J. 2002. The domains required to direct core proteins of  
746 hepatitis C virus and GB virus-B to lipid droplets share common features with plant oleosin  
747 proteins. *J Biol Chem* 277:4261-70.
- 748 67. Sorgi CA, Secatto A, Fontanari C, Turato WM, Belanger C, de Medeiros AI, Kashima S, Marleau  
749 S, Covas DT, Bozza PT, Faccioli LH. 2009. *Histoplasma capsulatum* cell wall {beta}-glucan induces  
750 lipid body formation through CD18, TLR2, and dectin-1 receptors: correlation with leukotriene  
751 B4 generation and role in HIV-1 infection. *J Immunol* 182:4025-35.

- 752 68. Vallochi AL, Teixeira L, Oliveira KDS, Maya-Monteiro CM, Bozza PT. 2018. Lipid Droplet, a Key  
753 Player in Host-Parasite Interactions. *Front Immunol* 9:1022.
- 754 69. Pacheco P, Bozza FA GR, Bozza M WP, Castro-Faria-Neto HC, PT. B. 2002. Lipopolysaccharide-  
755 induced leukocyte lipid body formation in vivo innate immunity elicited intracellular Loci  
756 involved in eicosanoid metabolism.pdf>. *J Immunol* 1:6498-506.
- 757 70. Bandeira-Melo C, Phoofolo M, Weller PF. 2001. Extranuclear lipid bodies, elicited by CCR3-  
758 mediated signaling pathways, are the sites of chemokine-enhanced leukotriene C4 production  
759 in eosinophils and basophils. *J Biol Chem* 276:22779-87.
- 760 71. Clark RI, Tan SW, Pean CB, Roostalu U, Vivancos V, Bronda K, Pilatova M, Fu J, Walker DW,  
761 Berdeaux R, Geissmann F, Dionne MS. 2013. MEF2 is an in vivo immune-metabolic switch. *Cell*  
762 155:435-47.
- 763 72. Dionne MS, Pham LN, Shirasu-Hiza M, Schneider DS. 2006. Akt and FOXO dysregulation  
764 contribute to infection-induced wasting in *Drosophila*. *Curr Biol* 16:1977-85.
- 765 73. Song Y, Li X, Li Y, Li N, Shi X, Ding H, Zhang Y, Li X, Liu G, Wang Z. 2014. Non-esterified fatty acids  
766 activate the ROS-p38-p53/Nrf2 signaling pathway to induce bovine hepatocyte apoptosis in  
767 vitro. *Apoptosis* 19:984-97.
- 768 74. Koppers AJ, Garg ML, Aitken RJ. 2010. Stimulation of mitochondrial reactive oxygen species  
769 production by unesterified, unsaturated fatty acids in defective human spermatozoa. *Free*  
770 *Radic Biol Med* 48:112-9.
- 771 75. Aitken RJ, Wingate JK, De Iuliis GN, Koppers AJ, McLaughlin EA. 2006. Cis-unsaturated fatty  
772 acids stimulate reactive oxygen species generation and lipid peroxidation in human  
773 spermatozoa. *J Clin Endocrinol Metab* 91:4154-63.
- 774 76. Krawczyk SA, Haller JF, Ferrante T, Zoeller RA, BE C. 2012. Reactive Oxygen Species Facilitate  
775 Translocation of Hormone Sensitive Lipase to the Lipid Droplet During Lipolysis in Human  
776 Differentiated Adipocytes. *PLoS ONE* 7:e34904.
- 777 77. Li X, Rommelaere S, Kondo S, Lemaitre B. 2020. Renal Purge of Hemolymphatic Lipids Prevents  
778 the Accumulation of ROS-Induced Inflammatory Oxidized Lipids and Protects *Drosophila* from  
779 Tissue Damage. *Immunity* 52:374-387 e6.
- 780 78. Bailey AP, Koster G, Guillermier C, Hirst EM, MacRae JI, Lechene CP, Postle AD, Gould AP. 2015.  
781 Antioxidant Role for Lipid Droplets in a Stem Cell Niche of *Drosophila*. *Cell* 163:340-53.
- 782 79. Bensaad K, Favaro E, Lewis CA, Peck B, Lord S, Collins JM, Pinnick KE, Wigfield S, Buffa FM, Li JL,  
783 Zhang Q, Wakelam MJO, Karpe F, Schulze A, Harris AL. 2014. Fatty acid uptake and lipid storage  
784 induced by HIF-1alpha contribute to cell growth and survival after hypoxia-reoxygenation. *Cell*  
785 *Rep* 9:349-365.
- 786 80. LaRock DL, Chaudhary A, Miller SI. 2015. Salmonellae interactions with host processes. *Nat Rev*  
787 *Microbiol* 13:191-205.
- 788 81. Narayanan LA, Edelmann MJ. 2014. Ubiquitination as an efficient molecular strategy employed  
789 in salmonella infection. *Front Immunol* 5:558.
- 790 82. Arena ET, Auweter SD, Antunes LC, Vogl AW, Han J, Guttman JA, Croxen MA, Menendez A, Covey  
791 SD, Borchers CH, Finlay BB. 2011. The deubiquitinase activity of the *Salmonella* pathogenicity  
792 island 2 effector, SseL, prevents accumulation of cellular lipid droplets. *Infect Immun* 79:4392-  
793 400.
- 794 83. Anand P, Cermelli S LZ, Kassan A, Bosch M SR, Huang L, Ouellette AJ, Pol A, Welte MA, SP. G.  
795 2012. A novel role for lipid droplets in the organismal antibacterial response. *Elife* 13:e00003.

- 796 84. Knight M, Braverman J, Asfaha K, Gronert K, Stanley S. 2018. Lipid droplet formation in  
797 Mycobacterium tuberculosis infected macrophages requires IFN-gamma/HIF-1alpha signaling  
798 and supports host defense. *PLoS Pathog* 14:e1006874.
- 799 85. Gandotra S, Lim K, Girousse A, Saudek V, O'Rahilly S, Savage DB. 2011. Human frame shift  
800 mutations affecting the carboxyl terminus of perilipin increase lipolysis by failing to sequester  
801 the adipose triglyceride lipase (ATGL) coactivator AB-hydrolase-containing 5 (ABHD5). *J Biol*  
802 *Chem* 286:34998-5006.
- 803 86. Sztalryd C, Xu G, Dorward H, Tansey JT, Contreras JA, Kimmel AR, Londos C. 2003. Perilipin A is  
804 essential for the translocation of hormone-sensitive lipase during lipolytic activation. *J Cell Biol*  
805 161:1093-103.
- 806 87. Gottar M GV, Michel T, Belvin M, Duyk G, Hoffmann JA, Ferrandon D, Royet J. 2002. The  
807 *Drosophila* immune response against Gram-negative bacteria is mediated by a peptidoglycan  
808 recognition protein. *Nature* 11:640-4.
- 809 88. Poirier L SA, Zheng J, Seroude L. 2008. Characterization of the *Drosophila* gene-switch system  
810 in aging studies: a cautionary tale. *Aging Cell* 2008 Oct; 7(5).

811

## 812 **MAIN FIGURES AND LEGENDS**

813 Including seven main figures.

814

815

816

817

818

819

820

821

822

823

824

825

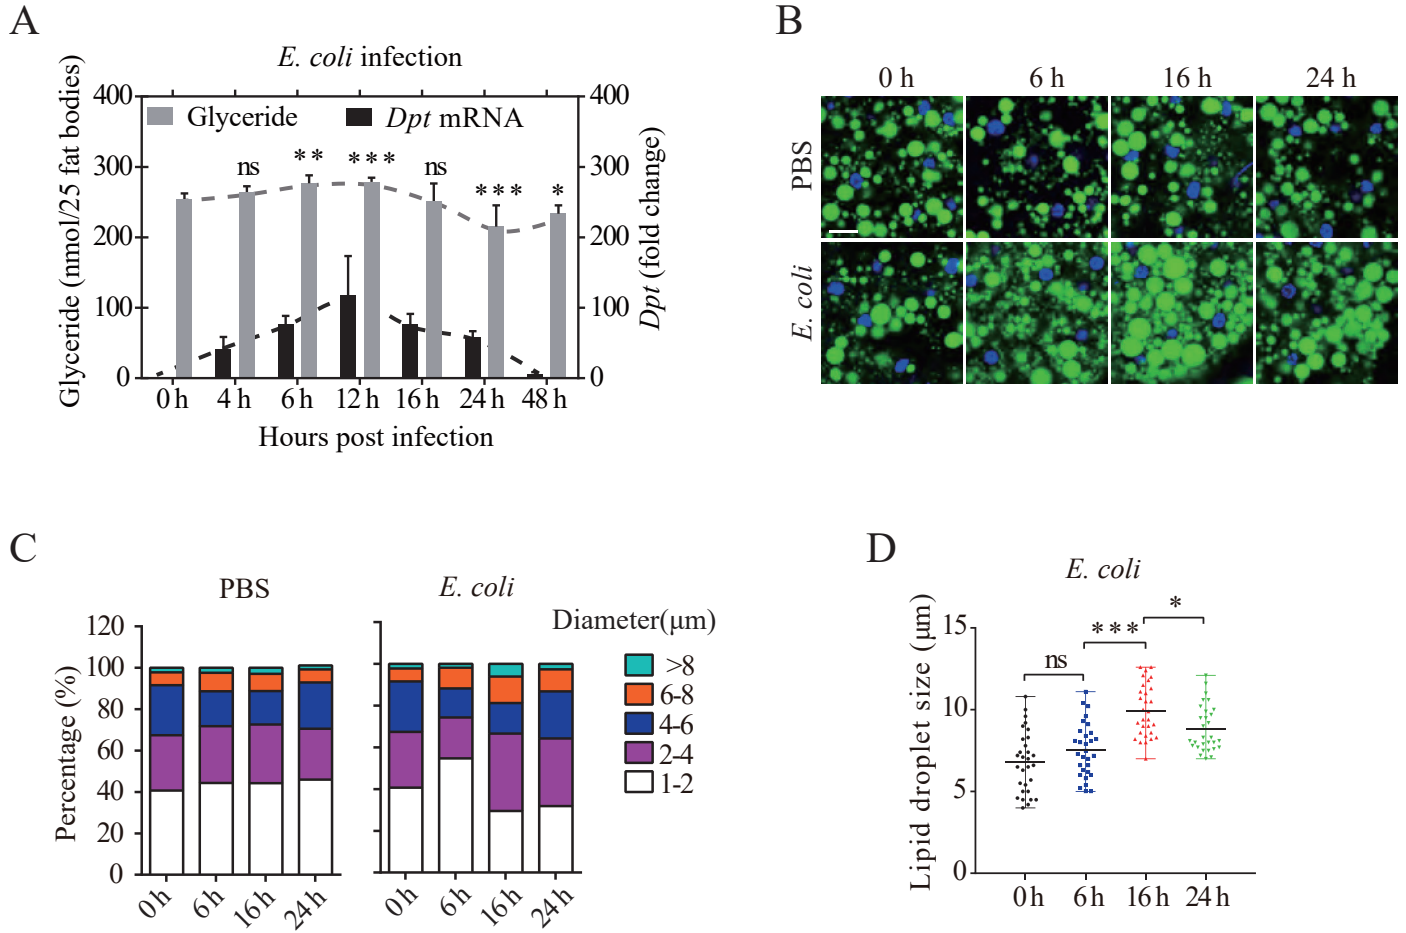

646 **Fig. 1.** *E. coli* infection switches lipid metabolism and LDs morphology in the fat body.  
647 (A) Relative *Dpteridin(Dpt)* mRNA expression and glyceride level in the fat body of  
648 wild type flies at indicated time points post *E. coli* infection. The mean values of *Dpt*  
649 mRNA expression or glyceride level was connected by dash line. The fold change of  
650 mRNA expression was normalized to that of 0 h and four independent repeats (n =20  
651 flies per repeat) were performed at each time point. Total glyceride level of 25 flies' fat  
652 body tissues was quantified in six biological replicates at each time point. (B and C)  
653 BODIPY staining (green) of LDs in the fat body of wild type flies at indicated time  
654 points post *E. coli* infection. Nuclei of fat body cells were stained with DAPI (blue).  
655 Scale bar: 10  $\mu$ m. The corresponding statistics of the distribution of LDs' size was  
656 shown in (C) for *E. coli* infection (n =30 cells for each time point). Eight fat bodies  
657 were examined for each time point.(D) The statistics of LDs' size (n =30 cells) in the  
658 fat body of wild type flies at indicated time point post *E. coli* infection. Each scattering  
659 dot represents the data from one fat body cell. Error bars represent the mean  $\pm$  s.d. (A-  
660 and mean with range (D). Data were analyzed by One-way ANOVA with Tukey's  
661 multiple-comparison test (A, D). \* $p < 0.05$ ; \*\* $p < 0.01$ ; \*\*\* $p < 0.001$ ; ns, not significant.  
662 **See also in Supplementary Figure 1.**

663  
664  
665  
666  
667  
668  
669  
670  
671  
672  
673  
674  
675  
676  
677  
678  
679  
680  
681  
682  
683  
684  
685  
686  
687  
688  
689

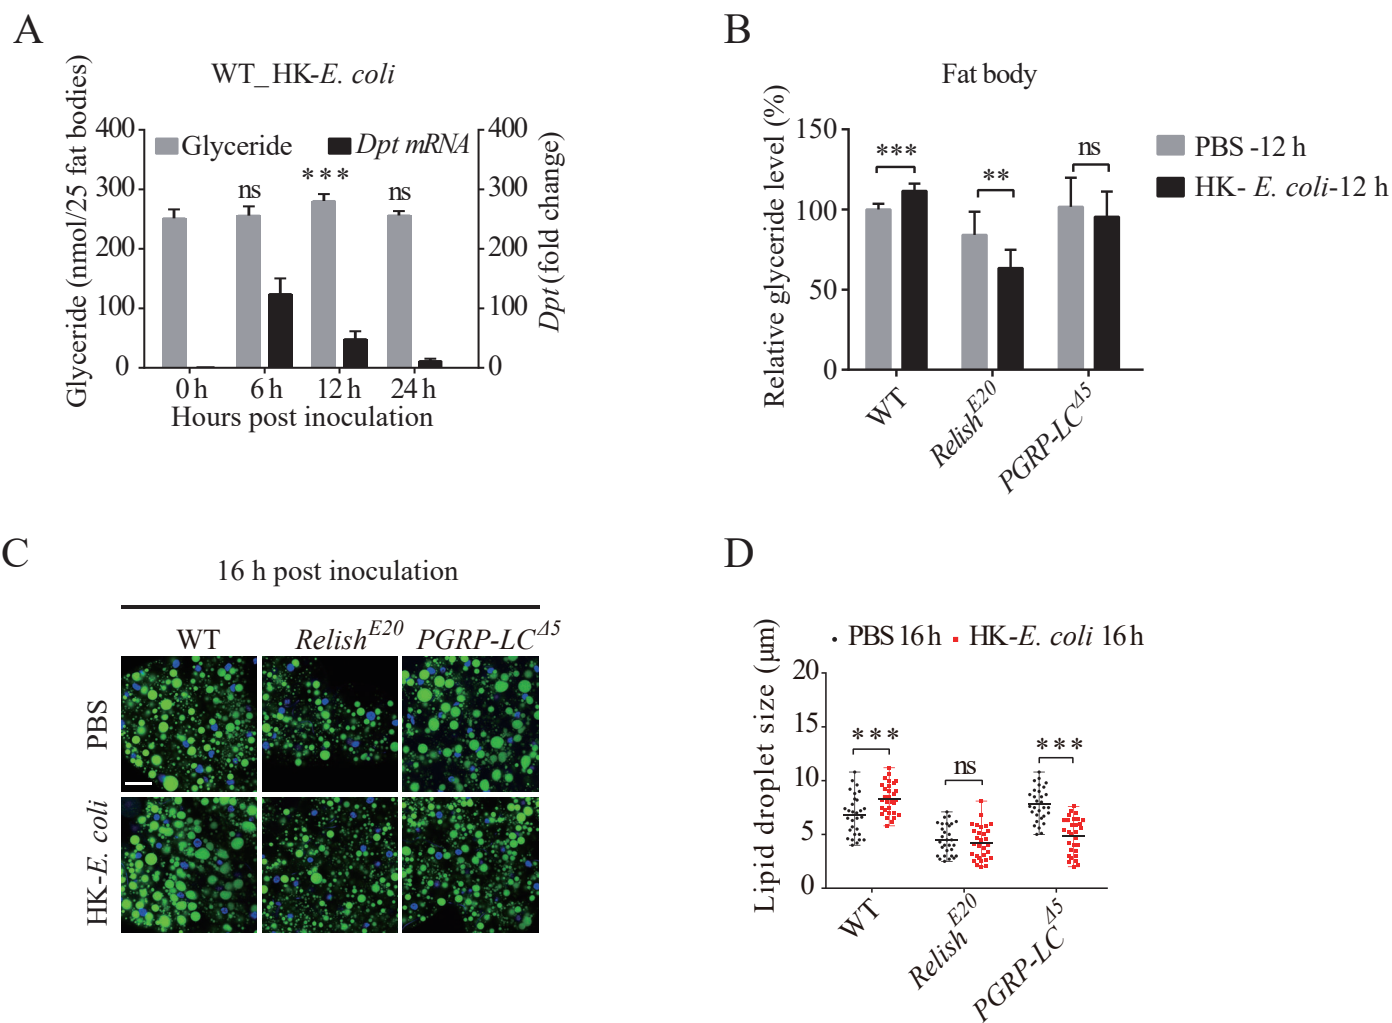

690 **Fig. 2.** IMD signaling pathway is required for the alteration of lipid metabolism and  
691 LDs morphology upon infection. **(A)** Relative *Dptericin* (*Dpt*) mRNA expression  
692 (black) and Fat levels (Grey) in the fat body of wild type flies at indicated time points  
693 post heat-killed *E. coli* (HK-*E. coli*) infection. The fold change of mRNA expression  
694 was normalized to that of 0 h and four independent repeats (n =20 flies per repeat) were  
695 performed at each time point. Total fat levels of 25 flies' fat body tissues was quantified  
696 in six biological replicates at each time point. **(B)** Relative glyceride level in the fat  
697 body of wild type and IMD pathway mutants (*Relish* and *PGRP-LC*). Each value of  
698 glyceride level was normalized to that of 0h of wild type. Each data contains four  
699 independent repeats (25 flies' fat body tissues per repeat). **(C and D)** BODIPY staining  
700 (green) of LDs **(C)** and the corresponding statistics of LDs' size (n =30 cells) **(D)** in the  
701 fat body of IMD pathway mutant flies and corresponding genetic control flies. Eight fat  
702 bodies were examined for each sample. Error bars represent mean  $\pm$  s.d. **(A-B)** or mean  
703 with range **(D)**. Data were analyzed by One-way ANOVA with Tukey's multiple-  
704 comparison test (A-B) and Multiple t-tests (D). Scale bar: 20  $\mu$ m. \* $p < 0.05$ ; \*\*  $p <$   
705 0.01; \*\*\*  $p < 0.001$ ; ns, no significance.

706

707

708

709

710

711

712

713

714

715

716

717

718

719

720

721

722

723

724

725

726

727

728

729

730

731

732

733



**A**

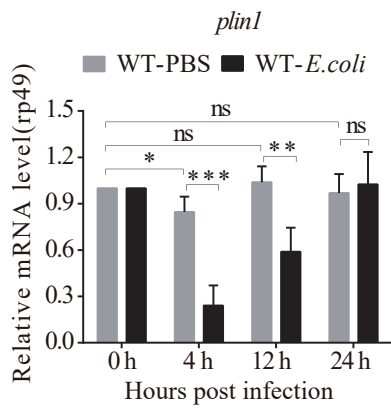

**B**

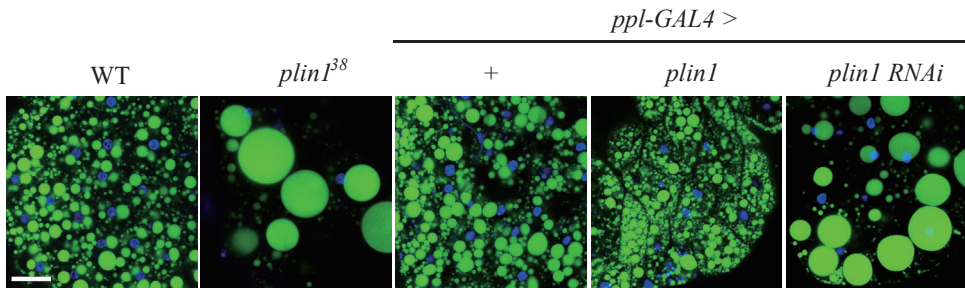

**C**

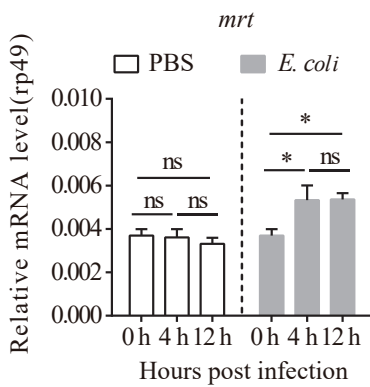

**D**

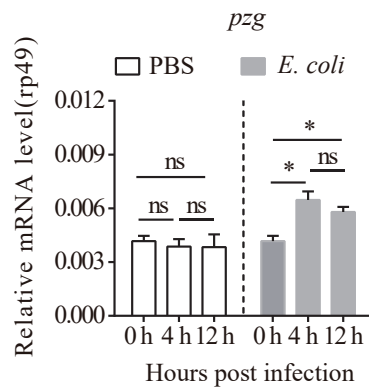

**E**

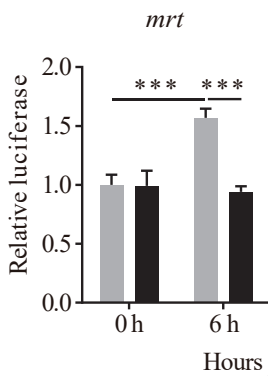

**F**

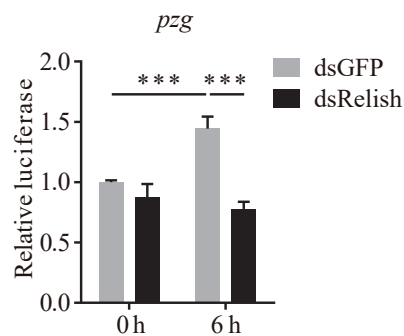

**G**

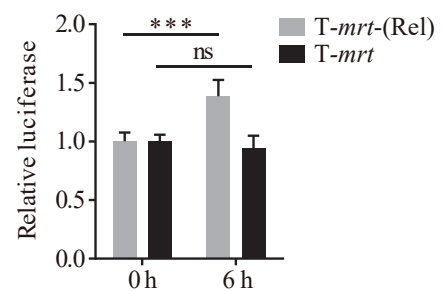

734 **Fig. 3.** *plin1* responds to IMD activation through Mrt/Pzg complex, and regulates LDs'  
735 morphology. (A) Relative *plin1* mRNA levels in the fat body of wild type flies at the  
736 indicated time points post *E. coli* infection. Flies treated with sterile PBS were used as  
737 a control. The fold change of mRNA expression was normalized to that of 0 h. (B)  
738 BODIPY staining (green) of LDs in the fat body of indicated flies. Nuclei of fat body  
739 cells were stained with DAPI (blue). Eight fat bodies were examined for each genotype.  
740 (C and D) Relative *mrt* (C) and *pzg* (D) mRNA levels in the fat body of wild type flies  
741 post *E. coli* infection. Flies treated with sterile PBS were used as a control. The fold  
742 change of mRNA expression was normalized to that of 0 h. Four independent repeats  
743 (n=20 flies fat body tissues per repeat) were performed at each time point for each group.  
744 (E and F) Relative luciferase activities of *mrt* (E) (Full length promoter of -1.5kb to  
745 +1bp including all predicted Relish Binding motifs in Fig. S3) reporter or *pzg* (F) (1.5  
746 KB upstream of TSS, all predicted Relish binding sites are covered) reporter in S2\* cells  
747 after double strand RNA (dsRNA) and PGN (35 µg/ml) treatment. All data were  
748 normalized to dsGFP control group at 0 h. (G) Relative luciferase activities of T-*mrt*  
749 (Rel) and T-*mrt* reporter in S2\* cells after PGN (35 µg/ml) treatment. All data were  
750 normalized to T-*mrt* (Rel) group at 0h. Three independent repeats were performed at  
751 each time point for each treatment. Error bars represent the mean ± s.d.. Data were  
752 analyzed by One-way ANOVA with Tukey's multiple-comparison test (A, C-D),  
753 Multiple t-tests (A) and Student's t test (E-G). Scale bar: 20 µm. \**p* < 0.05; \*\**p* < 0.01;  
754 \*\*\**p* < 0.001; ns, no significance. See also in Supplementary Figure 2 and 3.

755  
756  
757  
758  
759  
760  
761  
762  
763  
764  
765  
766  
767  
768  
769  
770  
771  
772  
773  
774  
775  
776  
777

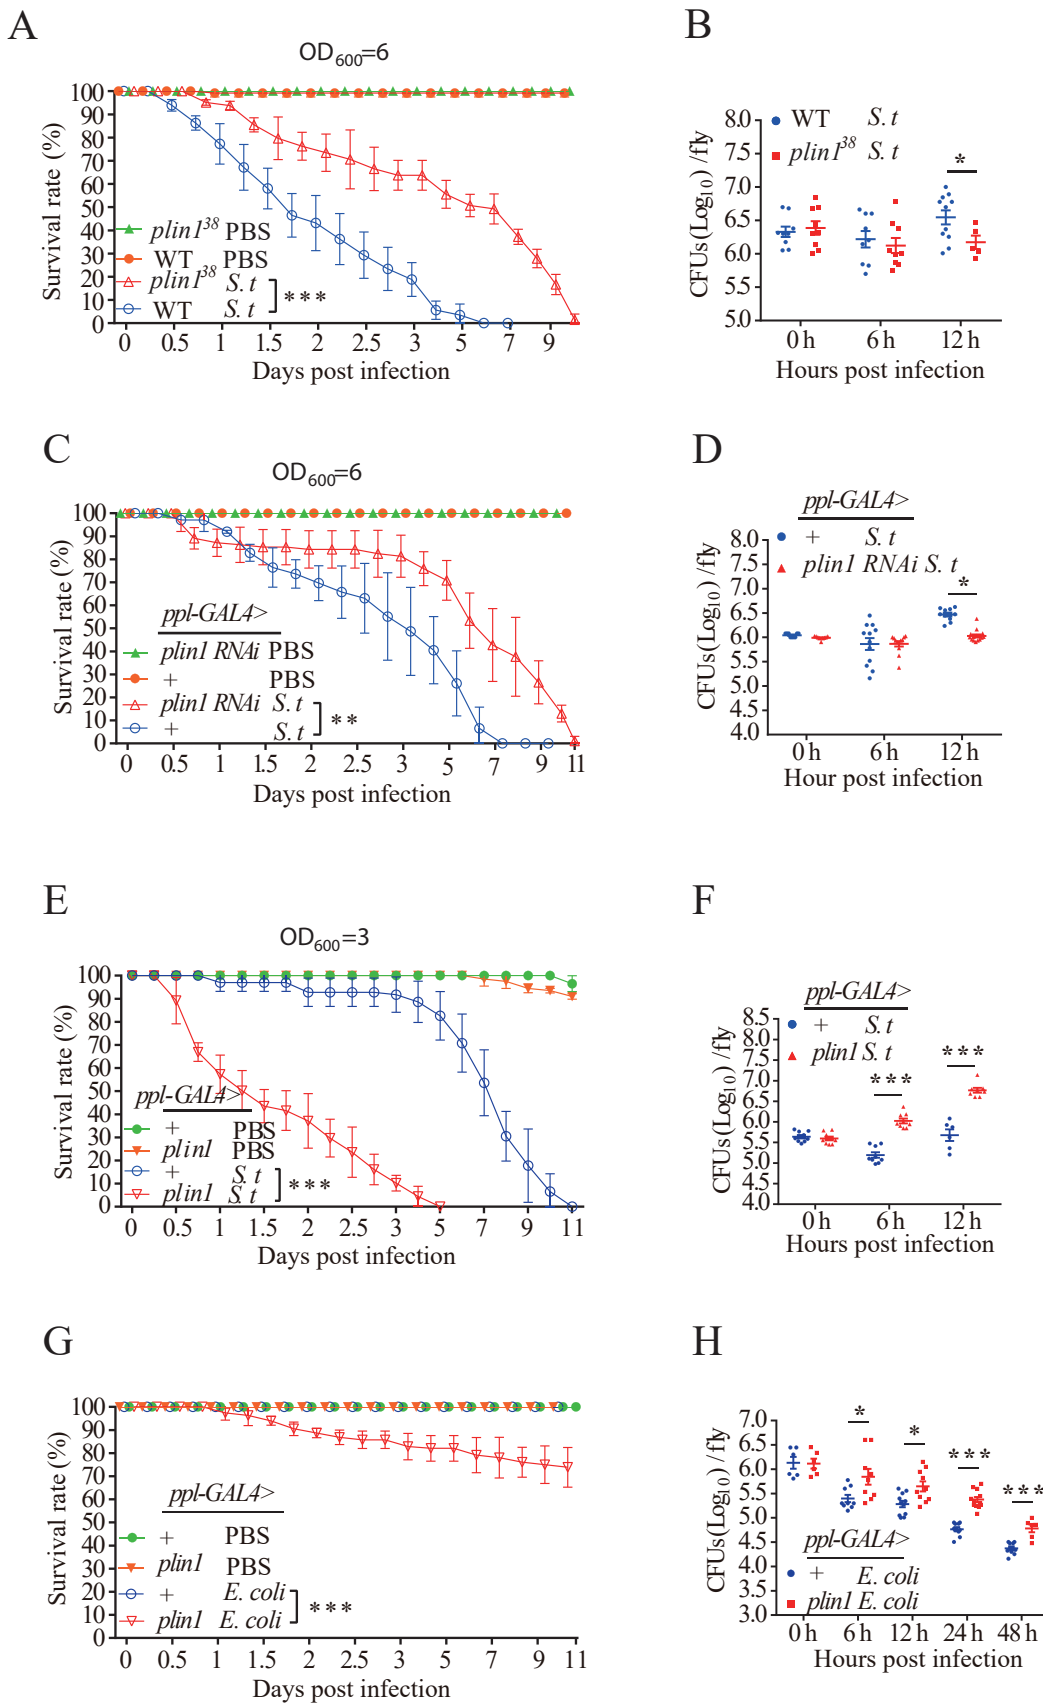

778 **Fig. 4.** *plin1* participates in the susceptibility of flies to bacterial infection. (A and B)  
779 Survival curves (A) and bacterial loads (CFUs) (B) of wild type and *plin1*<sup>38</sup> flies (n =60)  
780 post *S. typhimurium* infection. (C and D) Survival curves (C) and bacterial loads (CFUs)  
781 (D) of *ppl-GAL4>plin1 RNAi* and control flies (n =60) post *S. typhimurium* infection.  
782 (E and F) Survival curves (E) and bacterial loads (CFUs) (F) of *ppl-GAL4>plin1* and  
783 control flies (n =60) post *S. typhimurium* infection. (G and H) Survival curves (G) and  
784 bacterial loads (CFUs) (H) of *ppl-GAL4>plin1* and control flies (n =60) post *E. coli*  
785 infection. Values of plotted curves represent mean ± s.d. (A, C, E, G) of at least three  
786 independent repeats. Each scattering dot (CFUs) represents one technical replicate, line  
787 represents the mean of four independent repeats (B, D, F, H). Data were analyzed by  
788 Kaplan–Meier (A, C, E, G) and Multiple t-tests (B, D, F, H). \**p* < 0.05; \*\* *p* < 0.01;  
789 \*\*\* *p* < 0.001, ns, no significance. See also in Supplementary Figure 4.

790

791

792

793

794

795

796

797

798

799

800

801

802

803

804

805

806

807

808

809

810

811

812

813

814

815

816

817

818

819

820

821

# Figure 5

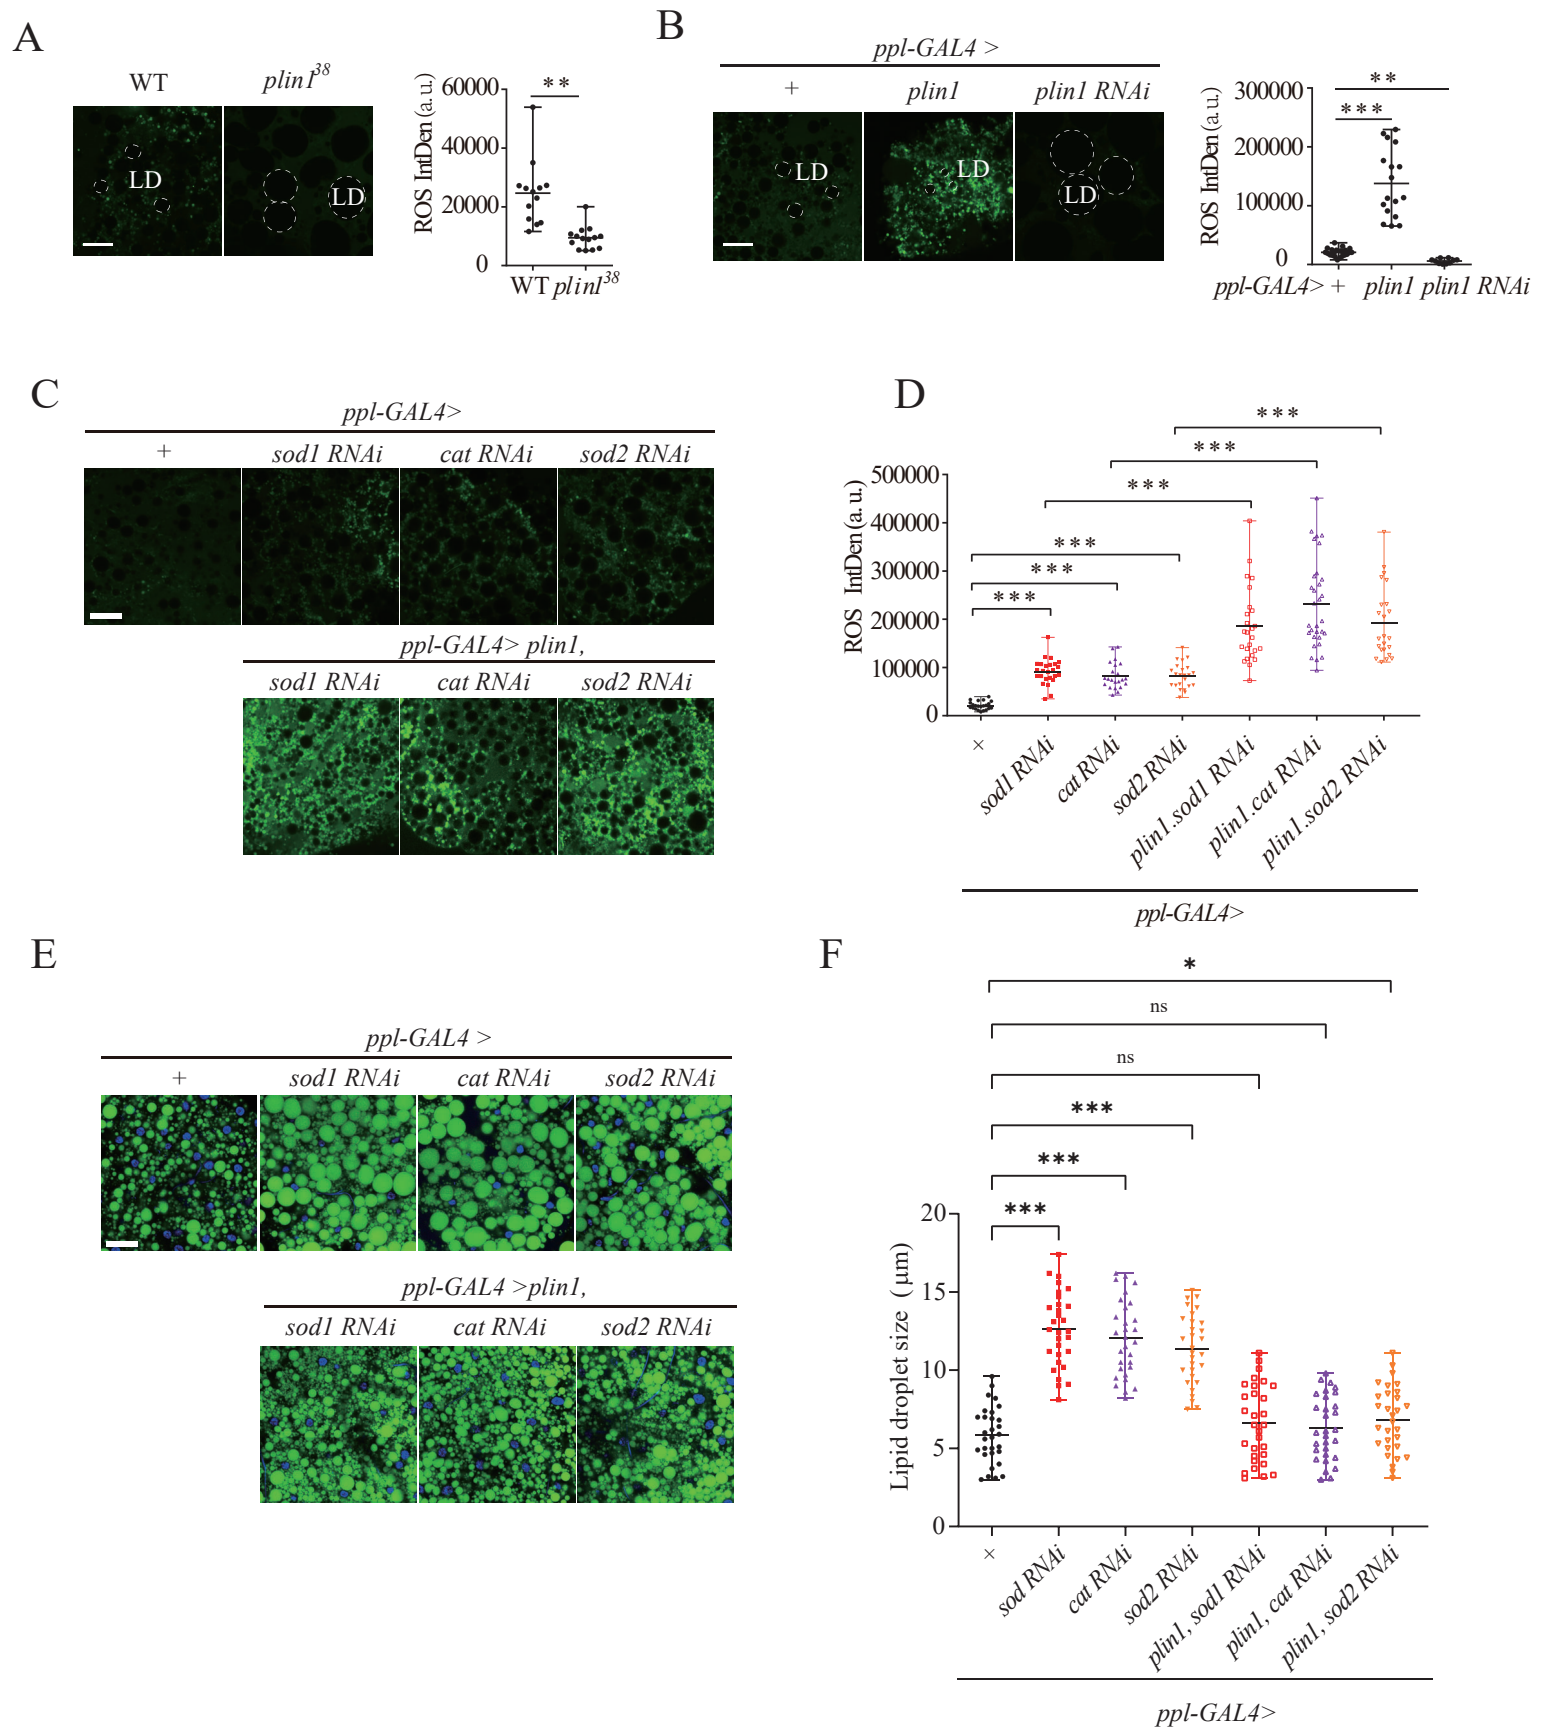

822 **Fig. 5.** Plin1-mediated reconfiguration of LDs is involved in the regulation of  
823 intracellular ROS. (A and B) ROS level indicated by DCFH-DA staining (green) in the  
824 fat body of indicated flies. The statistics of fluorescence intensity was plotted in (A) for  
825 *plin1*<sup>38</sup> and in (B) for *ppl-GAL4>plin1* and *ppl-GAL4>plin1-RNAi* flies and their  
826 genetic controls, respectively. Dashed circle indicated LDs. Eight fat bodies were  
827 examined for each sample and each scattering dot represents the data from one image.  
828 (C and D) ROS levels indicated by DCFH-DA staining (green) in the fat body of  
829 indicated one-week old adult flies and control flies (C). The corresponding fluorescence  
830 intensity was quantified in (D). Eight fat bodies were examined for each sample and  
831 each scattering dot represents the data from one image. (E and F) BODIPY staining  
832 (green) of LDs (E) and the corresponding statistics of LDs' size (n =30 cells) (F) in the  
833 fat body of indicated flies. Eight fat bodies were examined for each sample. Error bars  
834 represent the mean with range. Data was analyzed by Student's t test (A-B, D, F) and  
835 One-way ANOVA with Tukey's multiple comparison test (D, F). Scale bar: 20  $\mu$ m. \**p*  
836 < 0.05; \*\* *p* < 0.01; \*\*\* *p* < 0.001, ns, no significance.

837

838

839

840

841

842

843

844

845

846

847

848

849

850

851

852

853

854

855

856

857

858

859

860

861

862

863

864

865

# Figure 6

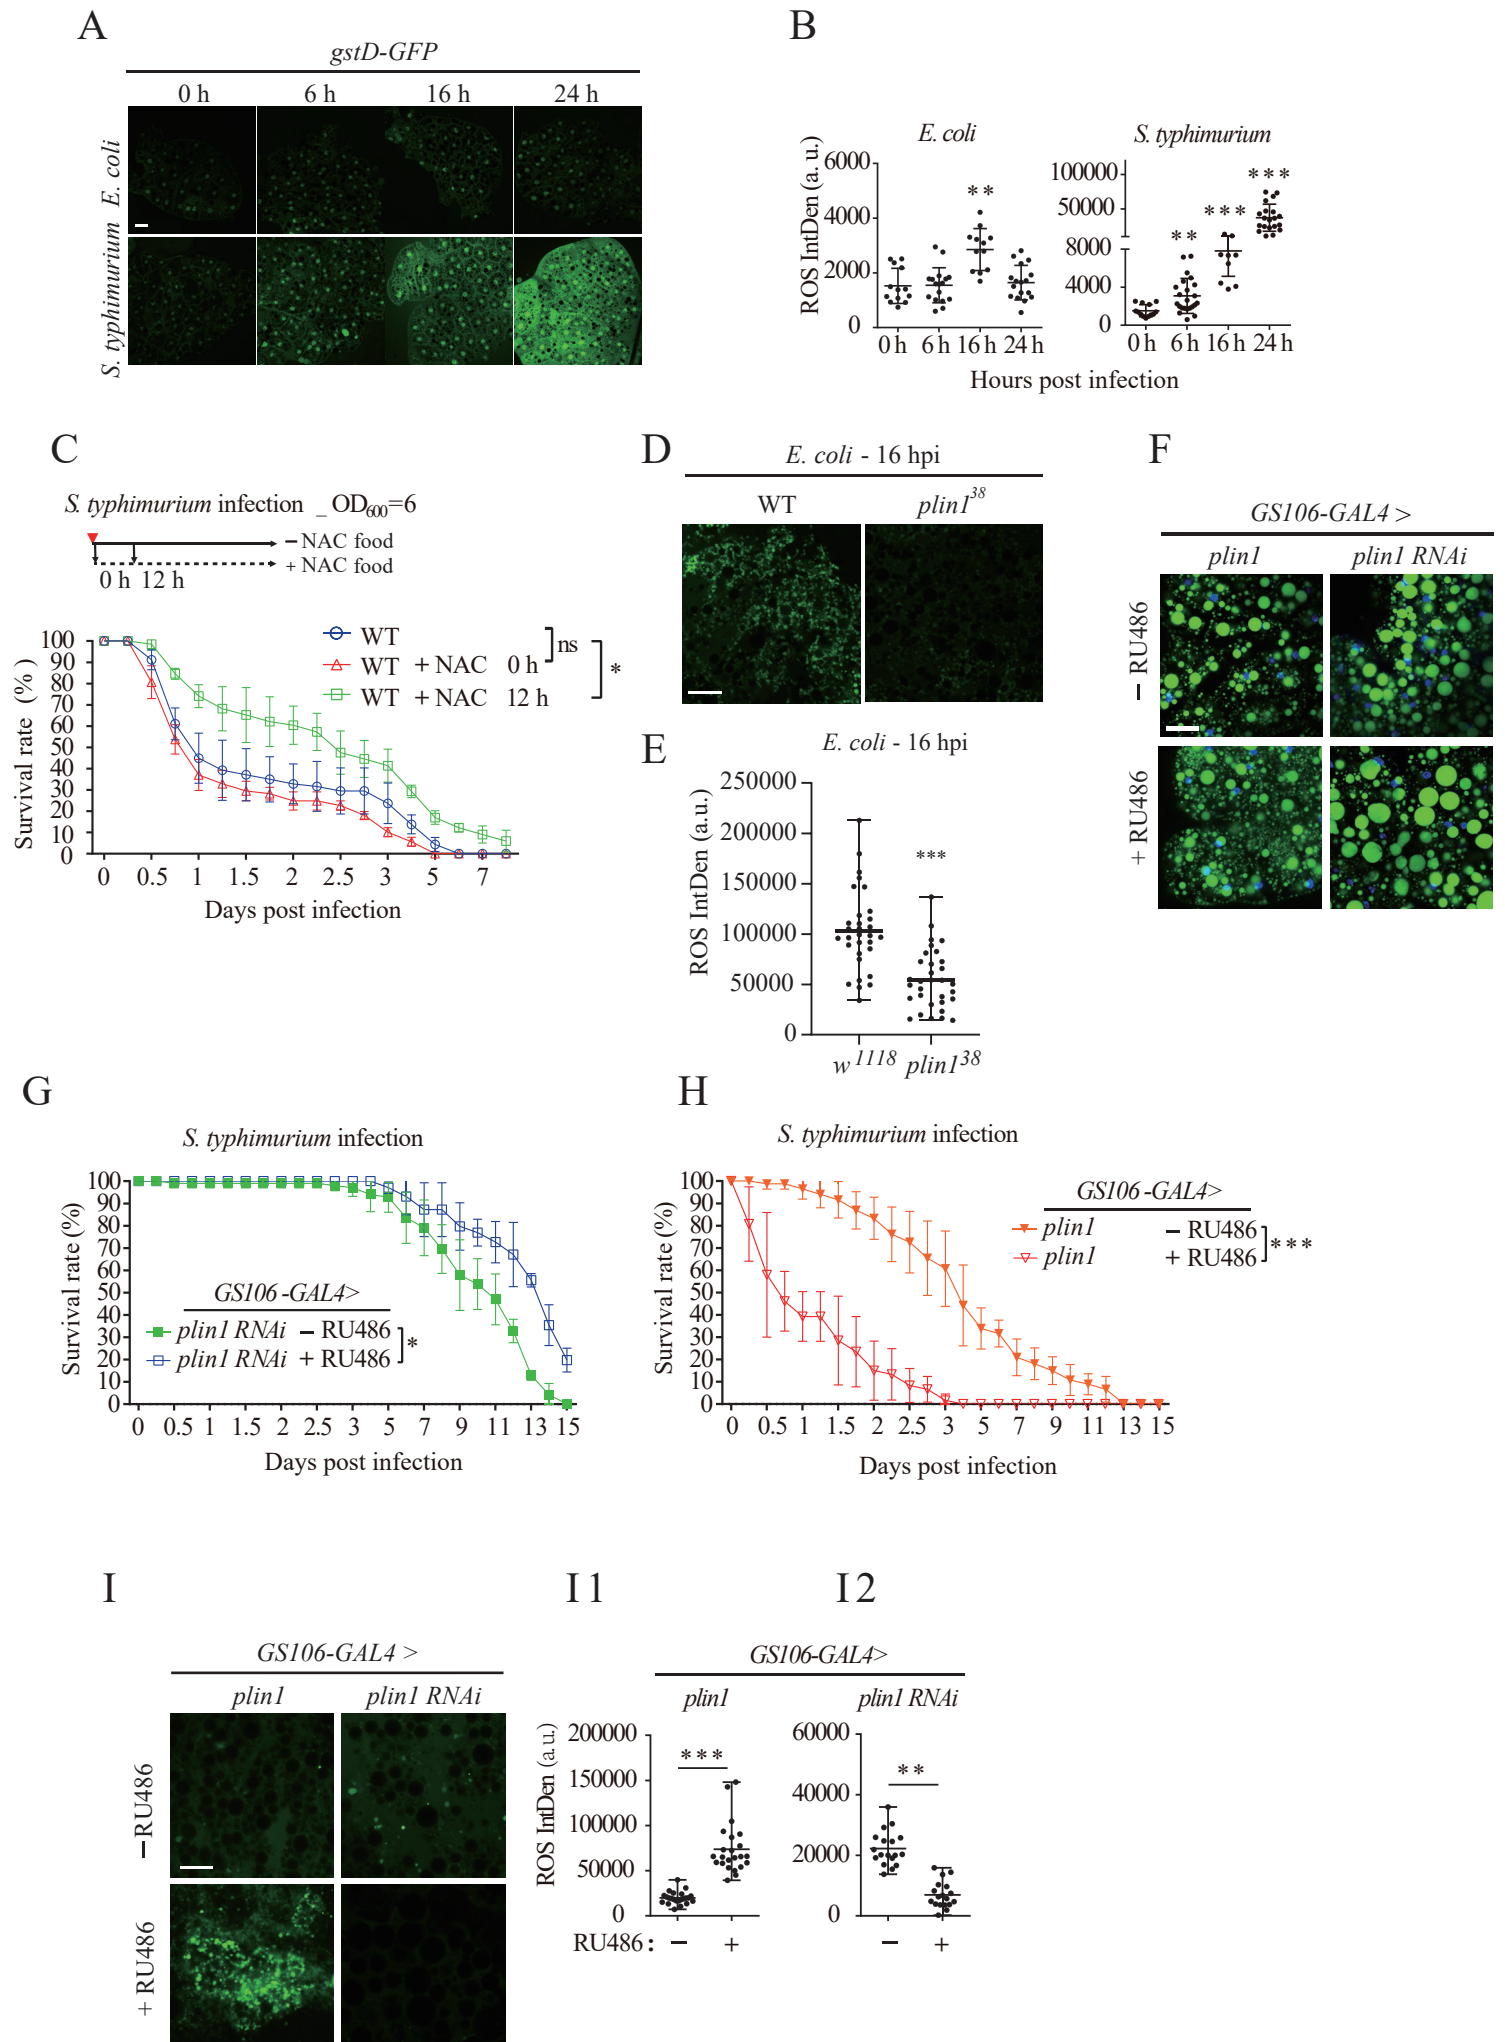

866 **Fig. 6.** Downregulated Plin1 benefits flies against bacterial infection through reducing  
867 oxidative stress. **(A and B)** ROS level indicated by GFP intensity (green) of *gstD-GFP*  
868 reporter in the fat body of wild type flies infected with *E. coli* (upper panel) or *S.*  
869 *typhimurium* (lower panel) at indicated time points. The statistics of GFP intensity was  
870 plotted in **(B)** for *E. coli* infection and *S. typhimurium* infection. Eight fat bodies were  
871 examined for each sample and each scattering dot represents the data from one image.  
872 **(C)** Survival curves of wild type flies (n=60 flies) with or without NAC treatment at  
873 indicated time post *S. typhimurium* infection. **(D and E)** ROS level indicated by DCFH-  
874 DA staining (green) in the fat body of indicated flies at 16 h post *E.coli* infection. **(F)**  
875 BODIPY staining (green) of LDs in the fat body of *GS106-GAL4>plin1* and *GS106-*  
876 *GAL4>plin1 RNAi* flies after treatment with (lower panel) or without (upper panel)  
877 RU486 treatment. Eight fat bodies were examined for each sample. **(G and H)** Survival  
878 curves of above flies (n =60) post *S. typhimurium* infection. **(I)** ROS level indicated by  
879 DCFH-DA staining (green) in the fat body of indicated flies with (lower panel) or  
880 without (upper panel) RU486 treatment. The statistics of fluorescence intensity was  
881 plotted in **(II)** for *GS106-GAL4>plin1* and in **(I2)** for *GS106-GAL4>plin1 RNAi* flies.  
882 Eight fat bodies were examined for each sample and each scattering dot represents the  
883 data from one image. Error bars represent the mean with range **(B, E, I)**. Values of  
884 plotted curves represent mean  $\pm$  s.d. of at least three independent repeats **(C, G-H)**.  
885 Data was analyzed by One-Way ANOVA with Tukey's multiple-comparison test **(B)**,  
886 Student's t test **(E, I)** and Kaplan–Meier **(C, G-H)**. Scale bar: 20  $\mu$ m. \* $p < 0.05$ ; \*\* $p <$   
887 0.01; \*\*\* $p < 0.001$ , ns, no significance.

888

889

890

891

892

893

894

895

896

897

898

899

900

901

902

903

904

905

906

907

908

909



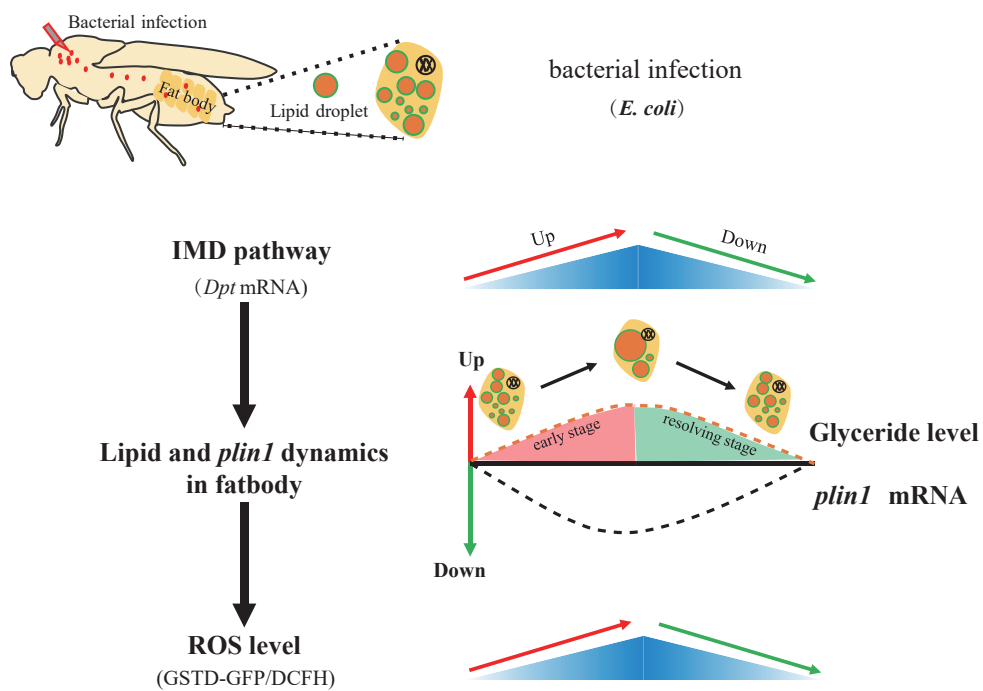

910 **Fig. 7.** The schematic diagram of LDs' morphogenesis mediated by Plin1 during  
911 infection-induced pathogenesis. LD's growth induced by downregulation of *plin1* in  
912 response to IMD signaling activation post bacterial infection. And enlarged LDs  
913 provides antioxidant role and benefits the host for anti-infection.

914

915

916

917

918

919

920

921

922

923

924

925

926

927

928

929

930

931

932

933

934

935

936

937

938

939

940

941

942

943

944

945

946

947

948

949

950

951

952

953

954 **SUPPLEMENTAL INFORMATION**

955 Supplemental Information includes four figures, and one table.

956 **Supplementary Figure Legends**

957

958

959

960

961

962

963

964

965

966

967

968

969

970

971

972

973

974

975

976

977

978

979

980

981

982

983

984

985

986

987

988

989

990

991

992

993

994

A

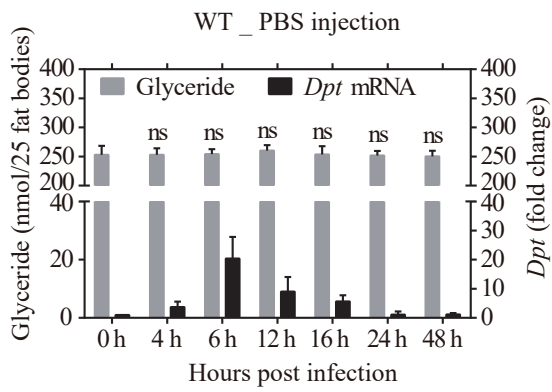

995 **Fig. S1.** IMD signaling modifies lipid metabolism and LDs morphology. Related to  
996 Figure 1. (A) Relative *Dpteracin* (*Dpt*) mRNA expression (black) and glyceride level  
997 (gray) in the fat body of wild type flies at indicated time points after sterile PBS  
998 injection. The fold change of mRNA expression was normalized to that of 0 h and four  
999 independent repeats (n =20 flies per repeat) were performed at each time point. Total  
1000 glyceride level of 25 flies' fat body tissues was quantified in six biological replicates at  
1001 each time point. Error bar mean  $\pm$  s.d. Data were analyzed by One-Way ANOVA with  
1002 Tukey's multiple-comparison test. \* $p < 0.05$ ; \*\* $p < 0.01$ ; \*\*\* $p < 0.001$ , ns, no  
1003 significance.

1004

1005

1006

1007

1008

1009

1010

1011

1012

1013

1014

1015

1016

1017

1018

1019

1020

1021

1022

1023

1024

1025

1026

1027

1028

1029

1030

1031

1032

1033

1034

1035

1036

1037

1038

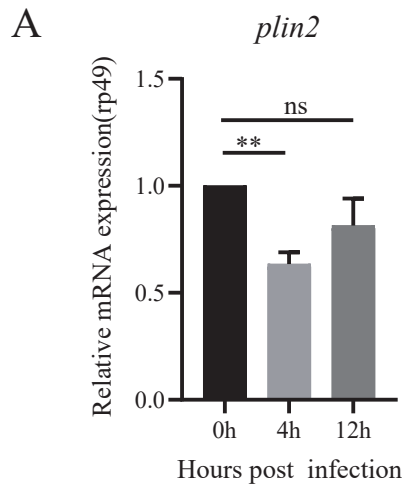

1039 **Fig. S2.** *Plin2* expression of fat body upon *E.coli* infection. Related to Figure 3. (A)  
1040 Relative *plin2* mRNA expression in the fat body of wild type flies at indicated time  
1041 points post *E.coli* infection. The fold change of mRNA expression was normalized to  
1042 that of 0 h and at least three independent repeats (n =20 flies per repeat) were performed  
1043 at each time point. Error bar mean  $\pm$  s.d. Data were analyzed by One-Way ANOVA with  
1044 Tukey's multiple-comparison test. \* $p < 0.05$ ; \*\* $p < 0.01$ ; \*\*\* $p < 0.001$ , ns, no  
1045 significance.

1046

1047

1048

1049

1050

1051

1052

1053

1054

1055

1056

1057

1058

1059

1060

1061

1062

1063

1064

1065

1066

1067

1068

1069

1070

1071

1072

1073

1074

1075

1076

1077

1078

1079

1080

1081

1082

A

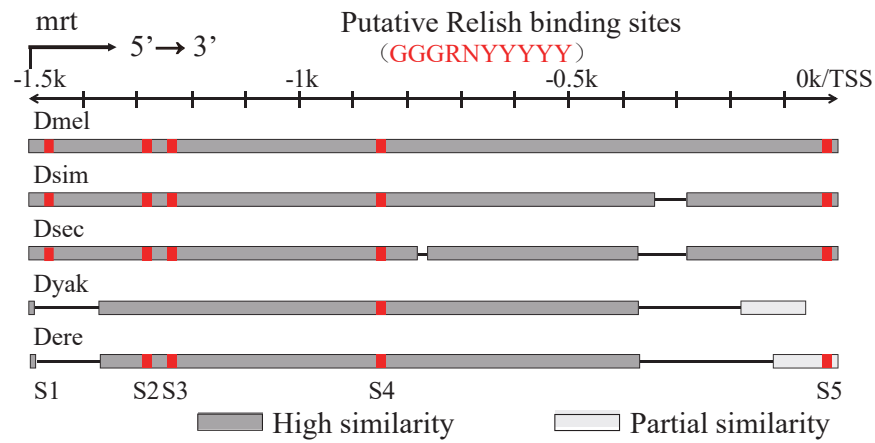

B

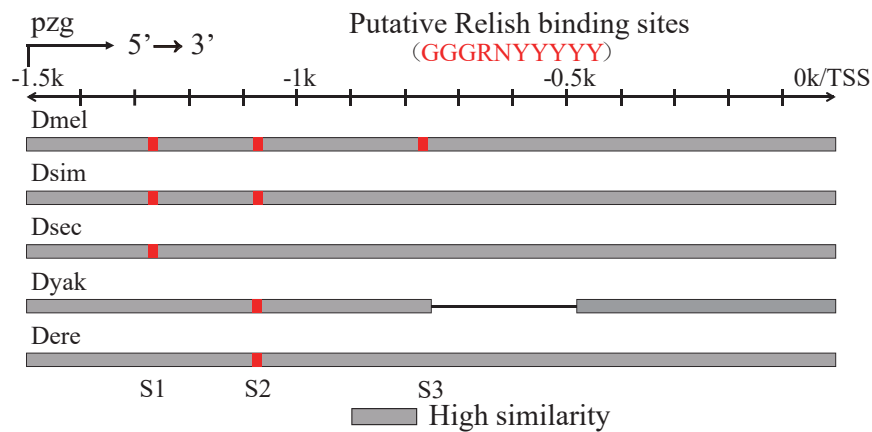

C

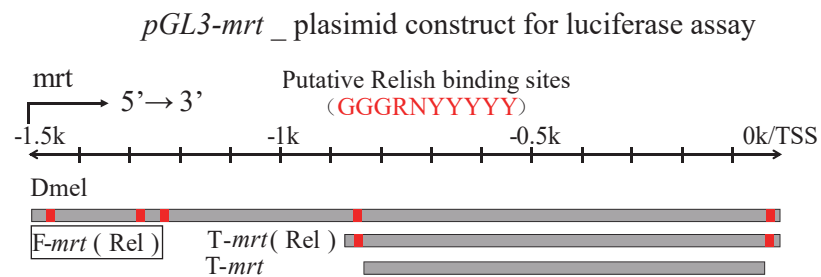



1083 **Fig. S3.** Relish/NF- $\kappa$ B potentially regulates the transcription of *mrt* or *pzg* in  
1084 *Drosophila* subgroups. Related to Figure 3. **(A and B)** Predicted Relish/NF- $\kappa$ B-binding  
1085 motifs in the promoter locus of *mrt* **(A)** and *pzg* **(B)** genes of five *Drosophila* subgroups.  
1086 *Dmel*, *Drosophila melanogaster*; *Dsim*, *D. simulans*; *sec*, *D. sechelia*; *Dyak*, *D. yakuba*;  
1087 *Dere*, *D. erecta*. S1-S5 represent the location site (red color) of conserved binding  
1088 motifs of Relish. Sequence alignment is analyzed by BLAST in flybase website. TSS:  
1089 transcription start site. **(C)** Schematic diagram of the *mrt* promoter locus and the  
1090 plasmid constructs used for luciferase assay. The full length (*mrt*:-1.5k to +1bp),  
1091 truncated length (T-*mrt* (Rel):-870 to +1bp) and mutant length (T-*mrt*:-870 to +1bp  
1092 without binding motifs) of *mrt* promoter were indicated.

1093

1094

1095

1096

1097

1098

1099

1100

1101

1102

1103

1104

1105

1106

1107

1108

1109

1110

1111

1112

1113

1114

1115

1116

1117

1118

1119

1120

1121

1122

1123

1124

1125

1126

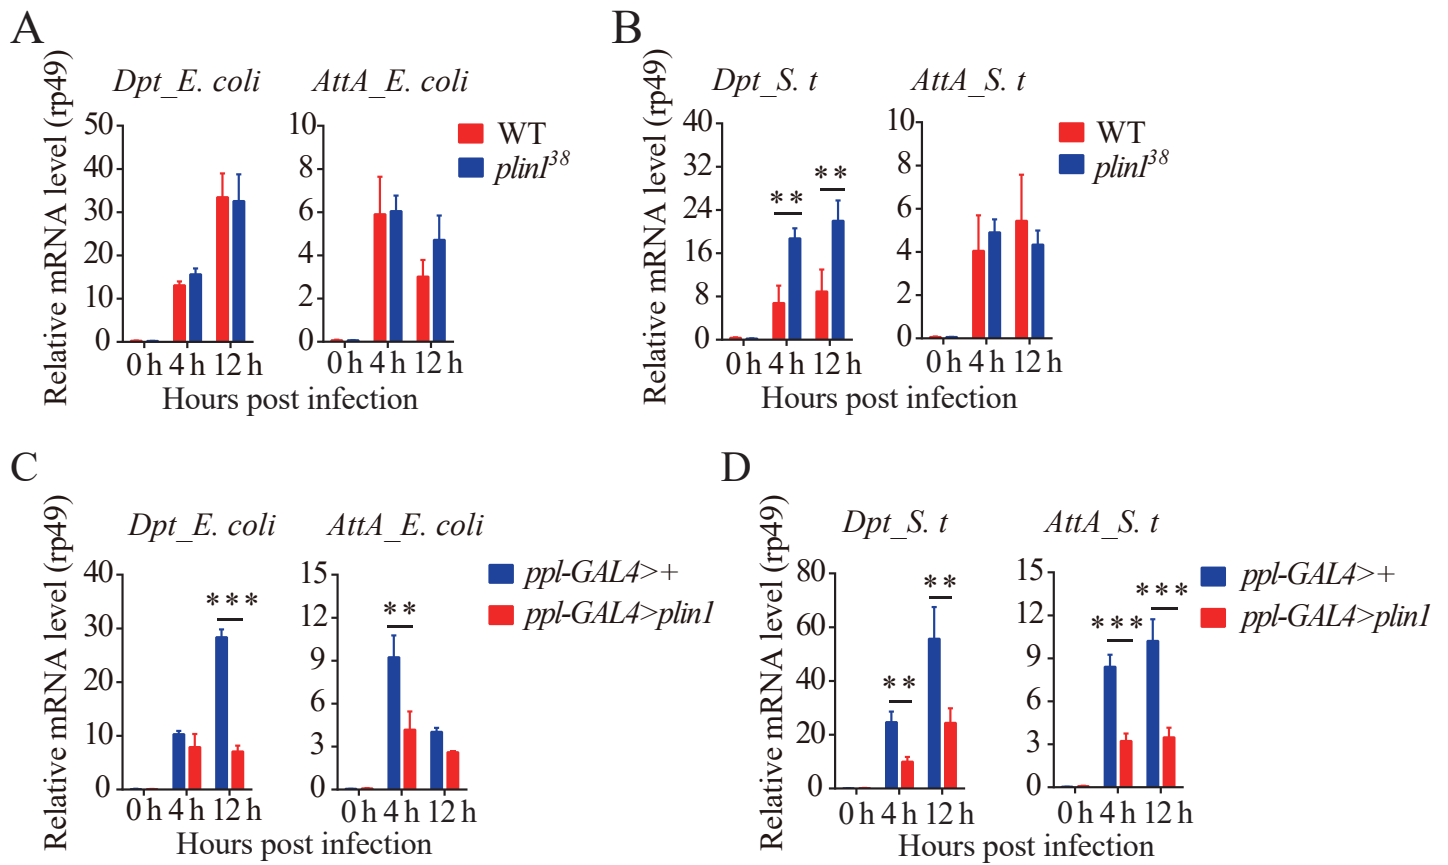

1127 **Fig. S4.** Overexpression *plin1* compromises AMP responses. Related to Figure 4. (A  
 1128 and B) Relative *dipteracin* (*Dpt*) and *attacin-A* (*AttA*) mRNA expression in the fat body  
 1129 of *plin1*<sup>38</sup> mutant flies and wild type flies at indicated time points post *E. coli* (A) or *S.*  
 1130 *typhimurium* (B) infection. Four independent repeats were performed (n = 20 per  
 1131 repeat). (C and D) Relative *dipteracin* (*Dpt*) and *attacin-A* (*AttA*) mRNA expression of  
 1132 *ppl-GAL4*> *plin1* flies and *ppl-GAL4*> + control flies at indicated time points post *E.*  
 1133 *coli* (C) and *S. typhimurium* (D) infection. Four independent repeats were performed (n  
 1134 = 20 per repeat). Error bars represent mean ± s.d. Data was analyzed by Multiple t-tests.  
 1135 \*\**p* < 0.01; \*\*\**p* < 0.001.

1136

1137 **Table S1: Primers used in this study.**

| Genes                                                       | Forward primer                                    | Reverse primer                                    |
|-------------------------------------------------------------|---------------------------------------------------|---------------------------------------------------|
| <b>qRT-PCR primers</b>                                      |                                                   |                                                   |
| <i>Rp49</i>                                                 | AGATCGTGAAGAAGCGCACCAAG                           | CACCAGGAACCTTCTTGAATCCGG                          |
| <i>Dpt</i>                                                  | GGCTTATCCGATGCCCGACG                              | TCTGTAGGTGTAGGTGCTTCCC                            |
| <i>AttA</i>                                                 | CACAACTGGCGGAACCTTTGG                             | AAACATCCTTCACTCCGGGC                              |
| <i>plin1</i>                                                | CAGCGCATACCACTGGTCTAT                             | GCATTACCGATTTGCTTGACAG                            |
| <i>plin2</i>                                                | CGAGCGCCTCCTTGAATAC                               | AGAACTCTTGCCATTCTGCAC                             |
| <i>mrt</i>                                                  | GGAGGATATTCTCGGAGTGGAGC                           | GCTTCCTGCCTCGTAGTCGAAC                            |
| <i>pzg</i>                                                  | GCTGAGGAACCACAACCATCTGAC                          | GTAACCTCGCCTTCGCCAGATT                            |
| <b>Primers for plasmid construction and dsRNA synthesis</b> |                                                   |                                                   |
| F- <i>mrt</i> (Rel)-luc                                     | CGAGATCTGCGATCTAAGTATAACG<br>TCGTAGCGCACACGCACACC | CAGTACCGGAATGCCAAGCTGGGT<br>GCACCCTTTGATCAAGGTCTT |
| pzg-luc                                                     | CGAGATCTGCGATCTAAGTACACAG<br>TAGCAGCACAACGGAGACG  | CAGTACCGGAATGCCAAGCTCTGT<br>AGCAGTTCTCGACGGACGCGT |
| T- <i>mrt</i> (Rel)-luc                                     | CGAGATCTGCGATCTAAGTAGCCAC<br>TTTGTCGCAGTGTATCTGT  | CAACAGTACCGGAATGCCAGCTGG<br>GTGCACCCTTTGATCAAG    |
| T- <i>mrt</i> -luc                                          | CGAGATCTGCGATCTAAGTACGTTA<br>GCTTTTTGCTGTCATTCGT  | CCAACAGTACCGGAATGCCAGATG<br>CTGTTGGAACAAGCAA      |
| dsRelish                                                    | TAATACGACTCACTATAGGGAGATC<br>AAACACGTGCCGC        | TAATACGACTCACTATACCCAGACT<br>CACGCTCTGTCTC        |
| dsGFP                                                       | TAATACGACTCACTATAGGGAGAAT<br>GGTGAGCAAGGGCGAGGA   | TAATACGACTCACTATAGGGAGACT<br>TGTACAGCTCGTCCATGC   |

1138
